# 1 **Quantifying the RNA cap epitranscriptome reveals novel caps in** 2 **cellular and viral RNA**

3 **Jin Wang<sup>1,2,\*</sup>, Bing Liang Alvin Chew<sup>2,3,4</sup>, Yong Lai<sup>2</sup>, Hongping Dong<sup>5</sup>, Luang Xu<sup>6</sup>,**  
4 **Seetharamsingh Balamkundu<sup>2,7</sup>, Weiling Maggie Cai<sup>2,8</sup>, Liang Cui<sup>2</sup>, Chuan Fa Liu<sup>7</sup>, Xin-**  
5 **Yuan Fu<sup>6</sup>, Zhenguo Lin<sup>9</sup>, Pei-Yong Shi<sup>10</sup>, Timothy K. Lu<sup>2,11</sup>, Dahai Luo<sup>3</sup>, Samie R. Jaffrey<sup>12</sup>**  
6 **and Peter C. Dedon<sup>2,13,\*</sup>**

7  
8 <sup>1</sup>School of Life Sciences, Inner Mongolia University, Hohhot, People's Republic of China

9 <sup>2</sup>Antimicrobial Resistance Interdisciplinary Research Group, Singapore-MIT Alliance for  
10 Research and Technology, Singapore

11 <sup>3</sup>Lee Kong Chian School of Medicine, Nanyang Technological University, Singapore

12 <sup>4</sup>NTU Institute of Health Technologies, Interdisciplinary Graduate Programme, Nanyang  
13 Technological University, Singapore.

14 <sup>5</sup>Shanghai Blueray Biopharma, Shanghai, People's Republic of China

15 <sup>6</sup>Cancer Science Institute of Singapore, Singapore

16 <sup>7</sup>School of Biological Sciences, Nanyang Technological University, Singapore

17 <sup>8</sup>Department of Microbiology, National University of Singapore, Singapore

18 <sup>9</sup>Department of Biology, Saint Louis University, St. Louis, MO USA

19 <sup>10</sup>Departments of Biochemistry & Molecular Biology and Pharmacology & Toxicology, and Sealy  
20 Center for Structural Biology & Molecular Biophysics, University of Texas Medical Branch,  
21 Galveston, TX USA

22 <sup>11</sup>Synthetic Biology Center, Departments of Biological Engineering and Electrical Engineering  
23 and Computer Science, Massachusetts Institute of Technology, Cambridge, Massachusetts  
24 USA

25 <sup>12</sup>Department of Pharmacology, Weill Medical College, Cornell University, New York, NY, USA

26 <sup>13</sup>Dept. of Biological Engineering, Massachusetts Institute of Technology, Cambridge, MA, USA

27

1 \*To whom correspondence should be addressed. Tel: +1 617 253 8017; Fax: +1 617 324 5280;

2 Email: [pcdedon@mit.edu](mailto:pcdedon@mit.edu)

3 Correspondence may also be addressed to Jin Wang. Tel: +86 471 499 2435; Fax: +86 471 499

4 2278; Email: [jinwang@imu.edu.cn](mailto:jinwang@imu.edu.cn)

5

## 6 **ABSTRACT**

7

8 Chemical modification of transcripts with 5' caps occurs in all organisms. Here we report a  
9 systems-level mass spectrometry-based technique, CapQuant, for quantitative analysis of the  
10 cap epitranscriptome in any organism. The method was piloted with 21 canonical caps –  
11 m<sup>7</sup>GpppN, m<sup>7</sup>GpppNm, GpppN, GpppNm, and m<sup>2,2,7</sup>GpppG – and 5 “metabolite” caps – NAD,  
12 FAD, UDP-Glc, UDP-GlcNAc, and dpCoA. Applying CapQuant to RNA from purified dengue  
13 virus, *Escherichia coli*, yeast, mice, and humans, we discovered four new cap structures in  
14 humans and mice (FAD, UDP-Glc, UDP-GlcNAc, and m<sup>7</sup>Gpppm<sup>6</sup>A), cell- and tissue-specific  
15 variations in cap methylation, and surprisingly high proportions of caps lacking 2'-O-methylation,  
16 such as m<sup>7</sup>Gpppm<sup>6</sup>A in mammals and m<sup>7</sup>GpppA in dengue virus, and we did not detect cap  
17 m<sup>1</sup>A/m<sup>1</sup>Am in humans. CapQuant accurately captured the preference for purine nucleotides at  
18 eukaryotic transcription start sites and the correlation between metabolite levels and metabolite  
19 caps. The mystery around cap m<sup>1</sup>A/m<sup>1</sup>Am analysis remains unresolved.

20

21

## 1 INTRODUCTION

2

3 Nearly all forms of RNA are post-transcriptionally modified on the nucleobases or ribose (1),  
4 including the 5'-terminal "caps" on messenger (mRNA) and other RNAs (2). The canonical cap  
5 on most eukaryotic and viral mRNAs is comprised of *N*<sup>7</sup>-methylguanosine (m<sup>7</sup>G) linked to the  
6 first nucleotide of the RNA by a reverse 5'-5' triphosphate bridge (**Figure 1A**) (2). This m<sup>7</sup>GpppX  
7 cap in its various forms (2) is absent in bacterial and archaeal transcripts. In many lower  
8 eukaryotes, including yeast, mRNAs contain mainly m<sup>7</sup>GpppN (cap 0), whereas in higher  
9 eukaryotes, the 5' penultimate and antepenultimate nucleotides can be 2'-O-methylated to  
10 different extents to generate m<sup>7</sup>GpppNm (cap 1) and m<sup>7</sup>GpppNmpNm (cap 2) structures (2).  
11 The m<sup>7</sup>GpppX cap has several important biological functions, such as protecting mRNA from  
12 degradation by 5'-exoribonucleases, directing pre-mRNA splicing and nuclear mRNA export,  
13 facilitating recognition by eukaryotic translation initiation factor 4E, and regulating various  
14 aspects of mRNA fate and function, including mRNA stability and mRNA translation (2). In  
15 addition, the ribose 2'-O methylation (Nm) at the 5' penultimate nucleotide is thought to be a  
16 molecular signature that discriminates self and non-self mRNA, and thus functions in antiviral  
17 defense (3).

18 The family of eukaryotic RNA caps has recently expanded to include a variety of GpppX  
19 variants and non-canonical structures, such as the non-methylated guanosine cap (GpppN) in  
20 insect oocyte mRNA (4). Building on the m<sup>7</sup>GpppAm motif, Moss and colleagues showed that  
21 up to 30% of caps in animal and viral mRNAs are also methylated at N<sup>6</sup> of Am (m<sup>6</sup>Am) (5).  
22 Multiple methylations also occur on the cap 5'-G, such as di- and tri-methylguanosine caps (e.g.,  
23 m<sup>2,2,7</sup>GpppN) in viral RNAs (6) and a subset of RNAP II-transcribed cellular RNAs, including  
24 small nuclear and nucleolar RNAs, and telomerase RNA (7). Perhaps the simplest methylated

1 cap structure involves  $\gamma$ -phosphate methylation of unprocessed 5'-triphosphate (mPPP<sub>N</sub>) on  
2 small RNAs such as mammalian U6 and 7SK, mouse B2, and plant U3 RNAs (7).

3 A variety of non-canonical caps involving nucleotide metabolites (**Figure 1A**) have also recently  
4 been described (8,9). For example, nicotinamide adenine dinucleotide (NAD) and coenzyme A  
5 (CoA) were found as cap-like structures in bacterial small RNAs (10) and the NAD cap was also  
6 found in yeast and human mRNA and non-coding RNAs (11). Julius and Yuzenkova expanded  
7 the potential repertoire of caps by demonstrating that a variety of nucleotide metabolites could  
8 initiate transcription by bacterial RNA polymerase (RNA Pol) *in vitro*, including flavin adenine  
9 dinucleotide (FAD), uridine diphosphate glucose (UDP-Glc), and uridine diphosphate *N*-  
10 acetylglucosamine (UDP-GlcNAc) (9). They also showed that capping with NAD and UDP  
11 analogs by bacterial RNA Pol is promoter-specific and stimulates promoter escape (9),  
12 suggesting a role for metabolite caps in regulating gene expression. For example, the NAD cap  
13 has been shown to influence RNA stability and turnover, and is a substrate for decapping  
14 enzymes (11). However, the lack of sensitive and specific analytical methods has hindered the  
15 systematic study of the cap landscape dynamics in cells.

16 Analysis of RNA cap structures has traditionally relied on radioisotope labeling and enzymatic  
17 hydrolysis, followed by thin-layer and other types of chromatography to resolve cap structures  
18 (12-14). While sensitive, the radiolabeling approach lacks specificity (12) and has the potential  
19 to create cellular toxicity artifacts (15,16). While two-dimensional electrophoresis (14) allows  
20 multiple caps analysis, it (i) lacks specificity for identifying intact cap structures, (ii) is limited to  
21 NpppN caps, (iii) does not provide absolute quantification, and (iv) is semi-quantitative at best.  
22 More recently, methods using high-pressure liquid chromatography (HPLC) with spectroscopic  
23 or mass spectrometry-based detection (LC-MS) have been developed (17-22). Though LC-MS  
24 provides chemical specificity, existing HPLC and LC-MS methods generally lack sensitivity and  
25 are not quantitative.

1 Here, we report a versatile and sensitive method for transcriptome-wide quantification of RNA  
2 caps – CapQuant – that combines off-line HPLC enrichment of cap nucleotides with isotope-  
3 dilution, chromatography-coupled triple-quadrupole mass spectrometry (LC-MS/MS) to enable  
4 absolute quantification of any type of RNA cap structure with sensitivity (amol-fmol) and  
5 chemical specificity. Piloted with 26 different cap structures, this “omic” approach provides  
6 important new insights into the landscape of RNA caps in cellular transcriptomes and viruses,  
7 and raises questions about current assumptions about cap biology.

8

## 9 **MATERIALS AND METHODS**

### 10 **Cell and virus culture**

11 CCRF-SB human B lymphoblasts (a gift from Dr. Jianzhu Chen, Singapore-MIT Alliance for  
12 Research and Technology) were cultured in RPMI-1640 supplemented with 10% FBS, 50 µg/ml  
13 streptomycin and 50 units/ml penicillin at 37 °C and 5% CO<sub>2</sub>. The cells were collected by  
14 centrifugation at 350 g for 10 min at 4 °C. *Saccharomyces cerevisiae* strain W1588-4C (a gift  
15 from Dr. Graham C. Walker, Massachusetts Institute of Technology) was grown exponentially in  
16 YPD medium (1% yeast extract, 2% peptone, 2% glucose) at 30 °C with shaking at 200 rpm. *E.*  
17 *coli* K-12 DH5α cells were grown exponentially in LB broth at 37 °C with shaking (220 rpm) to  
18 stationary phase. The cells were collected by centrifugation (4,000 g at 4 °C) and washed once  
19 with ice-cold PBS. All cells were stored at -80 °C until total RNA extraction. The preparation and  
20 culture of DENV-2 strain TSV01 and isolation of the viral particles were conducted as described  
21 previously (23). Briefly, mosquito cells C6/36 were infected with DENV-2 strain TSV01 at an  
22 MOI (multiplicity of infection) of 0.1. The infected cells were incubated at 29 °C for 5 days. The  
23 virus particles in cell culture supernatant were precipitated by adding 8% PEG8000 (w/v) and  
24 incubating the mixture overnight at 4 °C. The precipitated virus particles were then resuspended  
25 in NTE buffer (120 mM NaCl, 12 mM Tris-HCl, 1 mM EDTA, pH 8.0) and concentrated by

1 pelleting through a 24% (w/v) sucrose cushion at 75,000 g for 1.5 h at 4 °C. The virus pellet was  
2 resuspended into 4% (w/v) potassium tartrate in NTE buffer and centrifuged at 149,000 g for 2 h  
3 at 4 °C. The viruses were further purified by ultracentrifugation using a 10–30% (w/v) potassium  
4 tartrate gradient. The virus band was collected and concentrated using a 100 kDa centrifugal  
5 filter.

6

## 7 **Mouse tissues**

8 Three female C57BL/6 mice were bred in Comparative Medicine, National University of  
9 Singapore (NUS), following the policies and guidelines of the NUS Institutional Animal Care and  
10 Use Committee. The mice were sacrificed at 4-6 months of age for collection of tissues, which  
11 were snap-frozen in liquid nitrogen and stored at -80 °C.

12

## 13 **Cap nucleotide standards**

14 GpppA, GpppG, m<sup>7</sup>GpppA and m<sup>7</sup>GpppG were purchased from New England Biolabs (NEB;  
15 Ipswich, MA USA). NAD, FAD, UDP-Glc, UDP-GlcNAc and dpCoA were purchased from Sigma  
16 Chemical Co. (St. Louis, MO USA). m<sup>2,2,7</sup>GpppG was purchased from Jena Bioscience (Jena,  
17 Thuringia, Germany). [<sup>13</sup>C<sub>5</sub>]-β-Nicotinamide adenine dinucleotide ammonium salt (<sup>13</sup>C<sub>5</sub>-NAD)  
18 and [<sup>13</sup>C<sub>5</sub>]-flavin adenine dinucleotide ammonium salt hydrate (<sup>13</sup>C<sub>5</sub>-FAD) were purchased from  
19 Medical Isotopes (Pelham, NH USA). [<sup>13</sup>C<sub>6</sub>]-Uridine diphosphate glucose (<sup>13</sup>C<sub>6</sub>-UDP-Glc)  
20 disodium salt and uridine diphosphate *N*-acetylglucosamine-<sup>13</sup>C<sub>6</sub> (<sup>13</sup>C<sub>6</sub>-UDP-GlcNAc) disodium  
21 salt were from Omicron Biochemicals (South bend, IN USA). GpppAm- and m<sup>7</sup>GpppAm-capped  
22 RNA oligos were synthesized by *in vitro* 2'-*O*-methylation of the penultimate adenosine residue  
23 of G-capped and m<sup>7</sup>G-capped dengue RNA representing the first 211 nucleotides of DENV-4  
24 genome (strain MY-22713), respectively, by ScriptCap 2'-*O*-Methyltransferase. The dengue RNA  
25 was *in vitro* transcribed from PCR products amplified using an infectious cDNA clone as a  
26 template and the pairs of primer as below. Forward primer: 5'-

1 CAGTAATACGACTCACTATTAGTTGTTAGTCTGTGTGGAC-3', reverse primer: 5'-  
2 TAGCACCATCCGTAAGGGTC-3'. G-capped and m<sup>7</sup>G-capped RNA were generated using  
3 MEGAshortscript T7 Transcription Kit (Invitrogen) according to the manufacturer's instructions.  
4 Briefly, NTPs (ATP = 6 mM, GTP = 7.5 mM, CTP = 7.5 mM, UTP = 7.5 mM) and GpppA (1.5  
5 mM) or m<sup>7</sup>GpppA (1.5 mM) were added into the reaction. Capped RNA was purified by passing  
6 through two G-25 size columns (GE Healthcare), extracted with phenol–chloroform, and  
7 precipitated with ethanol. The purified capped RNA was subjected to 2'-O methylation using  
8 ScriptCap™ 2'-O-Methyltransferase (Epicentre) in the presence of cold S-adenosyl methionine  
9 (SAM) following the Instruction Manual. The methylated RNA oligos were purified in the same  
10 fashion as the capped RNA. RNA oligos (22 nt) with the following caps were synthesized by *in*  
11 *vitro* reaction of pppXGGCUCGAACUUAUGAUGACG (Bio-Synthesis Inc., X = C, U, G, A,  
12 m<sup>6</sup>A, Cm, Um or Gm) with the Vaccinia Capping System (VCS) in the presence or absence of  
13 SAM, according to manufacturer directions: GpppC, GpppU, Gpppm<sup>6</sup>A, m<sup>7</sup>GpppC, m<sup>7</sup>GpppU,  
14 m<sup>7</sup>Gpppm<sup>6</sup>A, GpppCm, GpppUm, GpppGm, m<sup>7</sup>GpppCm, m<sup>7</sup>GpppUm and m<sup>7</sup>GpppGm. 500-  
15 1000 pmol of each pppXGGCUCGAACUUAUGAUGACG RNA oligo was heated at 65 °C for 5  
16 min and then chilled on ice for 5 min. To the RNA was then added 10 µl of 10× Capping Buffer  
17 (NEB), 5 µl of 10 mM GTP, VCS (NEB, 50 U every two hours) and water, making a final volume  
18 of ~100 µl. For the synthesis of m<sup>7</sup>GpppN and m<sup>7</sup>GpppNm, 20 mM of cold SAM (2 µl per hour)  
19 was also added. The mixture was briefly mixed by vortexing and then incubated at 37 °C for 4 h,  
20 with the enzyme subsequently removed by extraction with chloroform:isoamyl alcohol 24:1  
21 (Sevag, Fluka). The RNA in the aqueous layer was then purified by passing through a 3000 Da  
22 spin filter, followed by washing three times with water. Gpppm<sup>6</sup>Am- and m<sup>7</sup>Gpppm<sup>6</sup>Am-capped  
23 RNA oligos were synthesized and purified as described previously (24). The synthesis and  
24 purification of RNA oligos with [<sup>15</sup>N<sub>5</sub>]-labeled G or m<sup>7</sup>G in the cap (GpppN, N = C, U, G, A or  
25 m<sup>6</sup>A; m<sup>7</sup>GpppN, N = C, U, G, A or m<sup>6</sup>A; GpppNm, Nm = Cm, Um, Gm or Am; and m<sup>7</sup>GpppNm,

1 Nm = Cm, Um, Gm or Am) were conducted with 200-500 pmol of each  
2 pppXGGCUCGAACUUAUGAUGACG oligo as RNA substrate in the same fashion except that  
3 [<sup>15</sup>N<sub>5</sub>]-GTP (Sigma Chemical Co.) was used instead of GTP in the VCS reaction step. RNA oligo  
4 carrying a [<sup>15</sup>N<sub>5</sub>]-m<sup>7</sup>Gpppm<sup>6</sup>Am cap was synthesized as follows. Briefly, 500 pmol of RNA oligo  
5 pppm<sup>6</sup>AGGCUCGAACUUAUGAUGACG (Bio-Synthesis Inc.; Lewisville, TX USA) was heated  
6 at 65 °C for 5 min and then chilled on ice for 5 min. To the RNA was then added 5 μl of 10×  
7 Capping Buffer, 5 μl of 10 mM GTP, 20 mM of cold SAM (2 μl per hour), VCS (20 U every 2 h),  
8 vaccinia mRNA 2'-O-methyltransferase (NEB, 250 U every 2 h) and water, making a final  
9 volume of ~50 μl. The mixture was briefly mixed by vortexing and then incubated at 37 °C for 4  
10 h, with the enzymes subsequently removed by extraction with Sevag. The RNA in the aqueous  
11 layer was then purified in the same way as described above. RNA oligo carrying a [<sup>15</sup>N<sub>5</sub>]-  
12 Gpppm<sup>6</sup>Am cap was synthesized as follows. Briefly, 250 pmol of oligo  
13 pppm<sup>6</sup>AGGCUCGAACUUAUGAUGACG (Bio-Synthesis Inc.; Lewisville, TX USA) was heated  
14 at 65 °C for 5 min and then chilled on ice for 5 min. To the RNA was then added 5 μl of 10×  
15 Capping Buffer, 2.5 μl of 10 mM [<sup>15</sup>N<sub>5</sub>]-GTP, 20 mM of cold SAM (1 μl per hour), VCS (10 U  
16 every two hours) and water, making a final volume of ~50 μl. The mixture was briefly mixed by  
17 vortexing and then incubated at 37 °C for 4 h, with the enzyme subsequently removed by  
18 extraction with Sevag. The RNA in the aqueous layer was purified in the same way as described  
19 above. The purified RNA was heated at 65 °C for 5 min and then chilled on ice for 5 min. To the  
20 RNA was then added 10 μl of 400 mM Tris-HCl pH 7.5, 10 μl of 50 mM DTT, 20 mM of cold  
21 SAM (2 μl per hour), DENV NS5 methyltransferase (200 pmol every two hours) and water,  
22 making a final volume of ~100 μl. The mixture was briefly mixed by vortexing and then  
23 incubated at 37 °C for 4 h, with the enzyme subsequently removed by extraction with Sevag.  
24 The RNA in the aqueous layer was purified in the same way as described above. All synthetic  
25 capped oligos were digested with NP1 (30 mM sodium acetate pH 5.5 and 1 mM ZnCl<sub>2</sub>, 37 °C)



1 and the caps purified by ion-pairing HPLC, with cap fractions concentrated and cleaned up by  
2 Speed-vac, as described in the HPLC section below. All purified synthetic cap dinucleotides  
3 were >99% or >98% pure based on HPLC and were characterized by high-resolution mass  
4 spectrometry (HRMS) (**Supplementary Table S2**) and MS/MS analyses (**Supplementary**  
5 **Figure S1**). The synthesis of RNA oligo containing a mixture of m<sup>7</sup>Gpppm<sup>1</sup>A and m<sup>7</sup>Gpppm<sup>1</sup>Am  
6 in the 5' cap and the release and purification of m<sup>7</sup>Gpppm<sup>1</sup>A and m<sup>7</sup>Gpppm<sup>1</sup>Am were conducted  
7 in the same fashion. The purified m<sup>7</sup>Gpppm<sup>1</sup>A and m<sup>7</sup>Gpppm<sup>1</sup>Am were >98% and >99% pure  
8 respectively based on HPLC, with their identity confirmed by MS/MS analysis (**Supplementary**  
9 **Figure S1**) and successful detection of m<sup>1</sup>A and m<sup>1</sup>Am, but not m<sup>6</sup>A and m<sup>6</sup>Am, respectively by  
10 LC-MS/MS (**Supplementary Figure S2**) using the same method as the LC-MS/MS method  
11 described below for Dimroth rearrangement analysis following hydrolysis into nucleosides by  
12 RNA 5' pyrophosphohydrolase (RppH, NEB) and shrimp alkaline phosphatase (SAP, NEB). The  
13 concentrations of the caps, m<sup>7</sup>Gpppm<sup>1</sup>A and m<sup>7</sup>Gpppm<sup>1</sup>Am were measured by their UV  
14 absorbance at 260 nm. The isotopic purity of the caps was found to be better than 99.6% (data  
15 not shown) based on LC-MS/MS analyses.

16

#### 17 **m<sup>1</sup>A, m<sup>6</sup>A, m<sup>1</sup>Am and m<sup>6</sup>Am nucleoside standards**

18 m<sup>1</sup>A, m<sup>6</sup>A and m<sup>6</sup>Am were purchased from Berry and Associates (Dexter, MI USA). m<sup>1</sup>Am was  
19 synthesized by reaction of methyl iodide (0.3 mL) with 2'-O-methyladenosine (100 mg) in  
20 anhydrous DMF (2.0 mL) in a closed flask with stirring at ambient temperature for 18 h. The  
21 reaction mixture was evaporated under vacuum and triturated with diethyl ether to afford a white  
22 solid (120 mg). A portion of this crude solid (40 mg) was dissolved in 3.0 mL of methanol and  
23 treated with aqueous ammonia (3.0 mL) by stirring at ambient temperature for 10 min. Following  
24 evaporation of solvent under vacuum, the mixture was resolved by chromatography on 200-400  
25 mesh silica gel eluted with 15-20% methanol in dichloromethane with 1% aqueous ammonia to  
26 afford m<sup>1</sup>Am (25 mg, 59%) as a white solid. The product was characterized by <sup>1</sup>H and <sup>13</sup>C NMR

1 **(Supplementary Figure S3)** and HRMS:  $^1\text{H}$  NMR (DMSO- $\text{D}_6$ , 400 MHz)  $\delta$  8.18 (s, 1H), 8.09 (s,  
2 1H), 7.03 (bs, H), 5.87 (d,  $J = 6.00$  Hz, 1H), 5.25 (d,  $J = 5.24$  Hz, 1H), 5.14 (t,  $J = 5.54$  Hz, 1H),  
3 4.29 (m, 1H), 4.25 (m, 1H), 3.95 (q,  $J = 10.68$  Hz, 1H), 3.65 (m, 1H), 3.56 (m, 1H), 3.43 (s, 3H),  
4 3.31 (s, 3H);  $^{13}\text{C}$  (DMSO- $\text{D}_6$ , 100 MHz)  $\delta$  154.8, 149.1, 141.9, 138.1, 123.1, 86.7, 85.9, 83.4,  
5 69.1, 61.8, 58.0, 35.1; HRMS (ESI,  $m/z$ ) calculated for  $\text{C}_{12}\text{H}_{18}\text{N}_5\text{O}_4$  [ $\text{M} + \text{H}$ ] $^+$ : 296.1359, found:  
6 296.1370, mass error < 5 ppm.

7

## 8 **$\text{H}_2\text{O}_2$ and MMS treatment**

9 Treatment of *S. cerevisiae* W1588-4C cells with 6 mM of MMS or 2 mM of  $\text{H}_2\text{O}_2$  was started  
10 when the O.D. reached  $\sim 0.5$ . After 1 h treatment, the cells were collected by centrifugation  
11 (4,500 g at 4 °C) and washed twice with ice-cold PBS.

12

## 13 **RNA extraction**

14 The total RNA from CCRF-SB pellets was directly extracted with TRIzol reagent (Life  
15 Technologies), according to the manufacturer's protocol. For mice, the liver and kidney tissues  
16 were ground under liquid nitrogen into fine powders in a mortar, the total RNA of which were  
17 then extracted with TRIzol reagent as described earlier. For yeast, total RNA was extracted with  
18 a MasterPure Yeast RNA Purification kit (Epicentre) following the manufacturer's protocol. For *E.*  
19 *coli*, lysis was performed with lysozyme, before total RNA was extracted with TRIzol reagent as  
20 described earlier. Briefly, 0.8 ml of TE buffer (pH 8.0) containing 80 mg lysozyme (Fluka) was  
21 added to approximately  $3.7 \times 10^{10}$  *E. coli* DH5 $\alpha$  cells and the mixture was incubated for 2 h at  
22 room temperature. To the mixture was then added 0.6 ml of TE buffer (pH 8.0) containing 60 mg  
23 lysozyme, followed by incubation for another 2 h at room temperature. Total RNA was  
24 subsequently extracted with TRIzol following the manufacturer's instructions. The genomic RNA  
25 from purified dengue virions was extracted with TRIzol and purified by size-exclusion

1 chromatography as described previously (23,25). The poly(A)-tailed RNA in human CCRF-SB  
2 cells was isolated from the total RNA using a Fasttrack MAG Maxi mRNA isolation kit (Life  
3 Technologies), whereas the poly(A)-tailed RNA in yeast cells and mouse tissues was isolated  
4 from the total RNA using a Dynabeads mRNA Purification kit (Life Technologies) following the  
5 manufacturer's protocols. rRNA depletion of the poly(A)-tailed RNA isolated from yeast cells and  
6 mouse tissues was subsequently performed using a GeneRead rRNA Depletion kit (Qiagen),  
7 according to the manufacturer's protocol. The rRNA-depleted RNA was then cleaned up using a  
8 RNeasy MinElute Cleanup kit (Qiagen), following the manufacturer's protocol. No rRNA  
9 depletion and subsequent clean-up was performed for the poly(A)-tailed RNA isolated from  
10 human CCRF-SB cells because there was no sign of significant rRNA contamination  
11 (**Supplementary Figure S4**). All RNA samples were stored at -80 °C before use. The quality of  
12 the total RNA (**Supplementary Figure S5**), poly(A)-tailed RNA (**Supplementary Figure S4**),  
13 and purified DENV-2 RNA genome (**Supplementary Figure S4**) was assessed using an Agilent  
14 Bioanalyzer (Agilent Technologies) with RNA 6000 Nano or Pico chips.

15

## 16 **RNA hydrolysis**

17 Isolated RNA (200 µg for total RNA and 0.6-7.8 µg for mRNA and RNA genome) was incubated  
18 with NP1 (1 unit/µg RNA, Sigma) in a solution containing 30 mM sodium acetate pH 5.5, 1 mM  
19 ZnCl<sub>2</sub> and 24 SIL-CNs at 37 °C for 1 h. These SIL-CNs included 200 fmol of NAD, 200 fmol of  
20 FAD, 500 fmol of UDP-Glc, 500 fmol of UDP-GlcNAc, 500 fmol of GpppC, 200 fmol of GpppU,  
21 400 fmol of GpppG, 500 fmol of GpppA, 500 fmol of Gpppm<sup>6</sup>A, 500 fmol of m<sup>7</sup>GpppC, 200 fmol  
22 of m<sup>7</sup>GpppU, 1000 fmol of m<sup>7</sup>GpppG, 500 fmol of m<sup>7</sup>GpppA, 100 fmol of m<sup>7</sup>Gpppm<sup>6</sup>A, 1000 fmol  
23 of GpppCm, 200 fmol of GpppUm, 1000 fmol of GpppGm, 500 fmol of GpppAm, 100 fmol of  
24 Gpppm<sup>6</sup>Am, 500 fmol of m<sup>7</sup>GpppCm, 200 fmol of m<sup>7</sup>GpppUm, 500 fmol of m<sup>7</sup>GpppGm, 500 fmol  
25 of m<sup>7</sup>GpppAm, and 200 fmol of m<sup>7</sup>Gpppm<sup>6</sup>Am. The enzyme was subsequently removed by

1 extraction with Sevag. The resulting aqueous layer was subjected to off-line HPLC separation  
2 for the enrichment of the CNs and their analogs ( $m^7Gpppm^1A$  and  $m^7Gpppm^1Am$ ) under study.

3

#### 4 **HPLC**

5 A 4.6 mm×250 mm Alltima HP C18 column (5  $\mu$ m in particle size, Hichrom) was used for the  
6 enrichment of CNs and their analogs from the enzymatic digestion products of RNA. A solution  
7 of 10 mM dibutylammonium acetate (DBAA) in 5% ACN-95% H<sub>2</sub>O (solution A) and 10 mM  
8 DBAA in 84% ACN-16% H<sub>2</sub>O (solution B) were used as mobile phases, and the flow rate was  
9 0.8 mL/min. A gradient of 20 min 0% B and 40 min 0-40% B was employed. A typical HPLC  
10 trace is depicted in **Figure 1C**. The HPLC fractions eluting approximately at 10.0-12.0, 13.5-15.9,  
11 19.0-20.6, 23.0-28.0, 32.0-36.0, 36.0-37.5, 37.5-39.0, 39.0-41.5, 41.5-43.0, and 43.0-46.5 min  
12 were pooled for NAD,  $m^7Gpppm^1A$ ,  $m^7Gpppm^1Am$ , (UDP-Glc and UDP-GlcNAc), ( $m^7GpppC$ ,  
13  $m^7GpppU$ ,  $m^7GpppG$  and  $m^7GpppCm$ ), (GpppC, GpppU, GpppG,  $m^7GpppA$  and  $m^7GpppUm$ ),  
14 (GpppA, Gpppm<sup>6</sup>A,  $m^7Gpppm^6A$ ,  $m^7GpppGm$ ,  $m^7GpppAm$ ,  $m^{2,2,7}GpppG$  and dpCoA), (FAD,  
15 GpppCm and  $m^7Gpppm^6Am$ ) and (GpppUm, GpppAm, GpppGm and Gpppm<sup>6</sup>Am), respectively.  
16 The collected fractions were dried in the Speed-vac, reconstituted in acetonitrile:water 3:7 (v/v)  
17 and dried for three cycles to remove the ion-pairing reagent present in the fractions,  
18 reconstituted in 8 mM ammonium bicarbonate pH 7.0 (solution C), and injected for LC-MS/MS  
19 analysis.

20

#### 21 **LC-MS/MS analysis of cap nucleotides**

22 Using purchased and synthetic standards, we defined the HPLC retention times for the 26 CNs  
23 and two analogs of them ( $m^7Gpppm^1A$  and  $m^7Gpppm^1Am$ ) on a Luna Omega PS C18 column  
24 (100 × 2.1 mm, 1.6  $\mu$ m) coupled to an Agilent 1290 HPLC system and an Agilent 6460 triple  
25 quad mass spectrometer. The elution was conducted at 15 °C and a flow rate of 200  $\mu$ L/min,

1 with a gradient of 100% solution C and 0% solution D (methanol) for 5 min, followed by 0% to  
2 48% solution D over a period of 12 min. The HPLC column was coupled to an Agilent 6460  
3 Triple Quad mass spectrometer with an electrospray ionization source in positive or negative  
4 mode with the following parameters: gas temperature, 350 °C; gas flow, 11 L/min; nebulizer, 20  
5 psi; sheath gas temperature, 300 °C; sheath gas flow, 12 L/min; capillary voltage, 1,800 V;  
6 nozzle voltage, 2,000 V; fragmentor voltage, 135 V;  $\Delta$ EMV, 400 V. MRM mode was used for  
7 detection of product ions derived from the precursor ions for all the 26 unlabeled CNs and 24  
8 SIL-CN<sub>s</sub> with instrument parameters which mainly included the collision energy (CE) optimized  
9 for maximal sensitivity for the CN<sub>s</sub> (mode, retention time in min, precursor ion of unlabeled CN  
10 *m/z*, product ion(s) of unlabeled CN *m/z* (CE), precursor ion of labeled CN *m/z*, product ion of  
11 labeled CN *m/z* (CE)): NAD, positive, 9.3, 664, 136 (39 V), 232 (24 V), 428 (30 V), 669, 136 (39  
12 V); FAD, positive, 14.0, 787, 348 (20 V), 136 (44 V), 439 (28 V), 782, 353 (20 V); UDP-Glc,  
13 negative, 1.3, 565, 323 (24 V), 79 (76 V), 211 (32 V), 570, 323 (24 V); UDP-GlcNAc, negative,  
14 1.4, 606, 385 (28 V), 273 (36 V), 282 (36 V), 612, 385 (28 V); GpppC, positive, 1.7, 749, 152 (60  
15 V), 754, 157 (60 V); GpppU, positive, 2.0, 750, 152 (28 V), 755, 157 (28 V); GpppG, positive,  
16 2.2, 789, 152 (60 V), 794, 157 (60 V); GpppA, positive, 3.9, 773, 136 (56 V), 778, 136 (56 V);  
17 Gpppm<sup>6</sup>A, positive, 8.8, 787, 150 (80 V), 792, 150 (80 V); m<sup>7</sup>GpppC, positive, 1.8, 763, 166 (56  
18 V), 768, 171 (56 V); m<sup>7</sup>GpppU, positive, 1.8, 764, 166 (36 V), 769, 171 (36 V); m<sup>7</sup>GpppG,  
19 positive, 5.4, 803, 248 (32 V), 808, 248 (32 V); m<sup>7</sup>GpppA, positive, 10.8, 787, 136 (68 V), 792,  
20 136 (68 V); m<sup>7</sup>Gpppm<sup>6</sup>A, positive, 9.3, 801, 150 (80 V), 806, 150 (80 V); GpppC<sub>m</sub>, positive, 2.3,  
21 763, 111 (52 V), 768, 111 (52 V); GpppU<sub>m</sub>, positive, 3.7, 764, 152 (40 V), 769, 157 (40 V);  
22 GpppG<sub>m</sub>, positive, 8.2, 803, 111 (56 V), 808, 111 (56 V); GpppA<sub>m</sub>, positive, 8.8, 787, 136 (60  
23 V), 792, 136 (60 V); Gpppm<sup>6</sup>A<sub>m</sub>, positive, 10.2, 801, 150 (72 V), 806, 150 (72 V); m<sup>7</sup>GpppC<sub>m</sub>,  
24 positive, 3.4, 777, 166 (52 V), 782, 171 (52 V); m<sup>7</sup>GpppU<sub>m</sub>, positive, 6.2, 778, 166 (32 V), 783,  
25 171 (32 V); m<sup>7</sup>GpppG<sub>m</sub>, positive, 8.5, 817, 166 (68 V), 822, 171 (68 V); m<sup>7</sup>GpppA<sub>m</sub>, positive,  
26 9.7, 801, 136 (68 V), 806, 136 (68 V); m<sup>7</sup>Gpppm<sup>6</sup>A<sub>m</sub>, positive, 10.8, 815, 150 (76 V), 820, 150

1 (76 V); dpCoA, positive, 11.7, 689, 261 (24 V), 348 (20 V), 136 (40 V); m<sup>2,2,7</sup>GpppG, positive,  
2 8.5, 831, 194 (64 V), 248 (28 V), 566 (32 V); m<sup>7</sup>Gpppm<sup>1</sup>A, positive, 4.2, 401, 166 (16 V), 150  
3 (36 V); m<sup>7</sup>Gpppm<sup>1</sup>Am, positive, 9.3, 408, 166 (16 V), 150 (32 V), 111 (36 V).

4

## 5 **Genome-wide nucleotide distribution of TSS**

6 To cross-validate the CapQuant results obtained in this study, transcriptional start site (TSS)  
7 nucleotide identities were mined from the 5' terminal positions of capped transcripts mapped  
8 using cap-analysis gene expression (CAGE) approach (26,27). CAGE datasets were chosen  
9 over others, such as serial analysis of gene expression, as the CAGE method captures mRNA  
10 transcripts at the 7-methylguanosine cap to pulldown the 5'-cDNAs reversely transcribed from  
11 them (28) for subsequent tagging and high-throughput sequencing. It achieves genome-wide  
12 1bp-resolution map of TSSs and expression levels. Mapped TSS reads are represented as units  
13 of peaks due to varying spread of positions which have first base signals within a promoter, and  
14 a reading of greater than 10 read counts and 1 tag per million (TPM) signifies a robust TSS  
15 signal. The TSS analysis workflow herein is outlined in **Supplementary Figure S6a**. CAGE  
16 data in .bedgraph format for *Sacharomyces cerevisiae* BY4741 was obtained from the  
17 YeastTSS Atlas (Yeast Transcription Start Site Atlas) (29). While CAGE data for human and  
18 mouse was obtained from the FANTOM5 project (Functional ANnotation Of Mammalian  
19 genomes) via <http://fantom.gsc.riken.jp/5/datafiles/reprocessed/> (30,31). These datasets were  
20 uploaded into the main public Galaxy server (32) into separate history list with the referent  
21 genome set to the latest assembly for further processing. First, non-robust TSS signals were  
22 removed in yeast data (c4 of .bedgraph file), a score of >1 and <-1 was Filtered for the positive  
23 and negative strand respectively. Second, GetFastaBed under BedTools (33) was used to  
24 extract the respective TSS nucleotide information in tab-delimited format and force  
25 strandedness applied to reverse complement negative sense strand. GetFastaBed for human  
26 and mouse data were obtained from thickStart and thickEnd (c7 and c8) positions, Trimmed up

1 to position 1 to obtain the 5' terminal nucleotide only, Change Case to upper case. Third, Count  
2 under Statistics to obtain the TSS nucleotide distribution histograms for human  
3 (**Supplementary Figure S6b**), mouse (**Supplementary Figure S6c**). and yeast data  
4 (**Supplementary Figure S6d**). As the number of transcripts generated from different TSSs can  
5 be very different, the weighted and unweighted nucleotide frequency of TSS could affect  
6 correlation accuracy. To account for the weight of TSS usage frequency according to transcript  
7 abundance, Datamash was performed by grouping the nucleotides together and summing the  
8 CTSS read counts (c5 of.bed file) to obtain the weighted values for human (**Supplementary**  
9 **Figure S6b**), mouse (**Supplementary Figure S6c**) and yeast (**Supplementary Figure S6d**).  
10 The work histories can be accessed via [https://usegalaxy.org/histories/list\\_published?f-](https://usegalaxy.org/histories/list_published?f-username=alvin_chew)  
11 [username=alvin\\_chew](https://usegalaxy.org/histories/list_published?f-username=alvin_chew)

12

### 13 **Dimroth rearrangement**

14 Due to the limited quantities of m<sup>7</sup>Gpppm<sup>1</sup>A and m<sup>7</sup>Gpppm<sup>1</sup>Am we obtained, we performed the  
15 testing of the Dimroth rearrangement with purchased m<sup>1</sup>A and synthetic m<sup>1</sup>Am nucleoside  
16 standards (**Supplementary Figure S7**). Because the CCRF-SB mRNA samples were the most  
17 abundant mammalian mRNA samples we had and they were the only mRNA samples for which  
18 no further purification by rRNA depletion was performed, we chose to use the CCRF-SB mRNA  
19 samples for the analysis. We treated a mixture of m<sup>1</sup>A and m<sup>1</sup>Am in the same fashion as CCRF-  
20 SB cells or the isolated RNA as we went through the RNA extraction, purification, cleanup and  
21 enzymatic digestion steps (**Supplementary Figure S7a**) as described above. The m<sup>1</sup>A, m<sup>6</sup>A,  
22 m<sup>1</sup>Am and m<sup>6</sup>Am in the samples were separated on a Hypersil GOLD aQ C18 column (100 × 1  
23 mm, 1.9 μm) coupled to an Agilent 1290 HPLC system and an Agilent 6460 triple quad mass  
24 spectrometer. The elution was conducted at 24 °C and a flow rate of 100 μL/min, with a gradient  
25 of 100% solution E (0.1% formic acid in water) to 89% solution E-11% solution F (0.1% formic  
26 acid in acetonitrile) over a period of 11 min, followed by a gradient of 11% to 80% solution F



1 over a period of 3 min. The HPLC column was coupled to an Agilent 6460 Triple Quad mass  
2 spectrometer with an electrospray ionization source in positive mode with the following  
3 parameters: gas temperature, 300 °C; gas flow, 5 L/min; nebulizer, 45 psi; sheath gas  
4 temperature, 200 °C; sheath gas flow, 5 L/min; capillary voltage, 3,500 V; nozzle voltage, 500 V;  
5 fragmentor voltage, 110 V;  $\Delta$ EMV, 800 V. MRM mode was used for detection of product ions  
6 derived from the precursor ions for m<sup>1</sup>A, m<sup>6</sup>A, m<sup>1</sup>Am and m<sup>6</sup>Am with the following instrument  
7 parameters (retention time in min, precursor ion *m/z*, product ion *m/z*, CE): m<sup>1</sup>A, 2.4, 282, 150,  
8 15 V; m<sup>6</sup>A, 6.1, 282, 150, 15 V; m<sup>1</sup>Am, 4.5, 296, 150, 15 V; m<sup>6</sup>Am, 7.8, 296, 150, 15 V.

9  
10 **RT-qPCR.** Quantitative real-time PCR (RT-qPCR) was performed to assess the relative mRNA  
11 abundance of a selection of RNA cap modification enzymes including PCIF1 (the enzyme  
12 responsible for the synthesis of m<sup>6</sup>A in mRNA caps), FTO (an RNA N<sup>6</sup>-methyladenine  
13 demethylase that can act on cap m<sup>6</sup>A/m<sup>6</sup>Am in mammals), DCP2 (a major RNA decapping  
14 enzyme in mammals) and CMTR1 (cap 1 2'-O-ribose methyltransferase), as well as ALKBH5  
15 (another RNA N<sup>6</sup>-methyladenine demethylase) in the total RNA from CCRF-SB cells and mouse  
16 liver and kidney tissues. 1 µg of total RNA was reverse transcribed using iScript™ cDNA  
17 Synthesis Kit (Bio-Rad) according to the manufacturer's instructions. The cDNA was subjected  
18 to qPCR analysis using BlitzAmp qPCR Master Mix (MiRXES Pte Ltd) according to the  
19 manufacturer's fast thermal cycling instructions on a CFX96 Realtime-PCR System (Bio-Rad).  
20 Experiments were performed with three biological and two technical replicates in hard-shell thin  
21 wall PCR plates (#HSP9601; Bio-Rad). No template and no reverse transcriptase controls were  
22 used to assess primer dimerization and genomic DNA contamination, respectively. Relative  
23 gene expression was calculated using a modified comparative method for geometric averaging  
24 of two reference genes, Gapdh and Polr2a, for more reliable normalization (34). Data  
25 visualization and Student's t-test statistical analysis was performed using Graphpad Prism  
26 software (version 8.0). Error bars represent mean ± s.d., and n.s. means not significant.



1

2

### 3 **RESULTS**

#### 4 **Development of CapQuant**

5 The workflow for CapQuant (**Figure 1B**) uses nuclease P1 (NP1) to hydrolyze RNA to  
6 nucleoside monophosphates (NMPs) while sparing di- and tri-phosphate linkages that  
7 characterize the NpppN and NppN caps (24,35). Following removal of NP1, cap structures and  
8 5'-NMPs in the limit digest are resolved by reversed-phase ion-pairing HPLC (**Figure 1C**) and  
9 cap-containing fractions isolated for subsequent LC-MS/MS quantification. Here we targeted 26  
10 caps that embraced a variety of known and possible structures: m<sup>7</sup>GpppN, m<sup>7</sup>GpppNm, GpppN,  
11 GpppNm (N = C, U, G, A or m<sup>6</sup>A), and NAD, FAD, UDP-Glc, UDP-GlcNAc, m<sup>2,2,7</sup>GpppG and  
12 dpCoA. The 26 caps were well resolved from 5'-NMPs (**Figure 1C**), separating each member of  
13 four isobaric pairs using mobile phases containing the volatile ion-pairing agent  
14 dibutylammonium acetate (DBAA). Cap-containing fractions were collected and the volatile ion-  
15 pairing agent completely removed by three cycles of drying and reconstitution in  
16 acetonitrile:water 3:7 (v/v). Samples were finally reconstituted in ammonium bicarbonate buffer  
17 (pH 7.0) for subsequent analysis.

18 Individual caps were next quantified by isotope-dilution LC-MS/MS, the most rigorous approach  
19 for sensitivity, specificity, and quantitative accuracy. HPLC conditions for the LC-MS/MS  
20 analysis were systematically optimized using standards for the 26 caps, with assessment of  
21 different solid phases (C18/NH<sub>2</sub> reversed-phase, HILIC, porous graphite), pH values (2.7-9.0),  
22 and column temperatures (10-45 °C). The best overall resolution and sensitivity were obtained  
23 with a positive-surface C18 column at 15 °C with volatile ammonium bicarbonate (pH 7.0) as a  
24 mobile phase. Isotope-labeled standards for 24 of the 26 caps were spiked into RNA samples  
25 prior to NP1 hydrolysis and each cap was identified by HPLC retention time and collision-

1 induced dissociation (CID) patterns, using MS parameters optimized for each cap (**Figure 1D**  
2 **and E; Supplementary Figure S8**). Quantification was achieved using a calibration curve for  
3 each cap (**Supplementary Figure S9**) generated by multiple-reaction monitoring (MRM), with  
4 one MRM transition for m<sup>7</sup>GpppN, m<sup>7</sup>GpppNm, GpppN and GpppNm caps and three MRM  
5 transitions for the other 6 caps (**Figure 1D and E, Supplementary Figure S8**). This resulted in  
6 limits of detection (LODs) ranging from 19 amol to 13 fmol for 23 caps, and up to 160 fmol for 3  
7 caps (GpppC, GpppCm and GpppGm; **Supplementary Table S1**). As shown in **Figure 1D and**  
8 **E**, which depicts applications of the method to mouse (C57BL/6) kidney mRNA and *Escherichia*  
9 *coli* DH5 $\alpha$  total RNA, CapQuant proved to be sensitive, precise, and accurate.

10 Using this new method, control experiments were performed to ensure complete cap release  
11 and stability during sample processing. To confirm that all detected caps were indeed covalently  
12 linked to mRNA prior to NP1 digestion and not present as contaminants, we used the method to  
13 analyze *S. cerevisiae* mRNA and *E. coli* total RNA except that NP1 was removed from its stock  
14 solution with a 3000 Da filter and the filtrate used in the RNA digestion reaction. None of the cap  
15 analytes were detectable in subsequent LC-MS/MS analyses, from which we conclude that  
16 CapQuant analytes are truly RNA caps. To validate complete and unbiased release of all m<sup>7</sup>G  
17 caps from RNA, we quantified release of m<sup>7</sup>GpppN and m<sup>7</sup>GpppNm (N = C, U, G, A or m<sup>6</sup>A)  
18 from synthetic oligonucleotides, with the results showing quantitative release of all m<sup>7</sup>GpppN  
19 and m<sup>7</sup>GpppNm caps (**Supplementary Figure S10**). Finally, the stability of cap structures  
20 during NP1 digestion was verified by spiking cap standards into the RNA digestion reactions  
21 with subsequent HPLC purification and isotope-dilution LC-MS/MS analysis (**Figure 1D and E**).

22 Recently a new type of mRNA cap has been proposed containing m<sup>1</sup>A (36-38). These caps,  
23 m<sup>7</sup>Gpppm<sup>1</sup>A or m<sup>7</sup>Gpppm<sup>1</sup>Am, were predicted based on the binding of m<sup>1</sup>A antibodies to 5'  
24 ends of mRNA (39). However, no biochemical validation was presented. To quantify these caps

1 biochemically, we first wanted to develop cap purification protocols that would preserve m<sup>1</sup>A,  
2 due to the potential for this nucleotide to convert to m<sup>6</sup>A by the Dimroth rearrangement  
3 (**Supplementary Figure S7a**) (36-38), we defined the fate of m<sup>1</sup>A and m<sup>1</sup>Am ribonucleosides  
4 during the RNA isolation and processing. As shown in **Supplementary Figure S7b**, conversion  
5 of m<sup>1</sup>A to m<sup>6</sup>A occurred at each step – TRIzol RNA extraction (7%), polyA-tailed RNA  
6 purification (17%), GeneRead rRNA depletion (36%), and RNeasy MinElute Cleanup (72%).  
7 This means that for yeast and mouse RNA, which were processed with all steps, 86% of initial  
8 m<sup>1</sup>A would have been converted to m<sup>6</sup>A. With LODs of 0.68 fmol for m<sup>7</sup>Gpppm<sup>1</sup>A and 0.11 fmol  
9 for m<sup>7</sup>Gpppm<sup>1</sup>Am (**Supplementary Table S1**), m<sup>1</sup>A- and m<sup>1</sup>Am-containing caps present at 10  
10 fmol per μg of RNA, which is the lowest level among all of the canonical caps in humans, mice,  
11 and yeast as discussed shortly, would remain detectable even with 90% loss. For human RNA,  
12 which was processed without rRNA depletion and the RNA cleanup steps, m<sup>1</sup>A and m<sup>1</sup>Am  
13 losses were at most 23%, so m<sup>7</sup>Gpppm<sup>1</sup>A and m<sup>7</sup>Gpppm<sup>1</sup>Am should be readily detectable in  
14 human mRNA if present.

15 Based on our validation steps, CapQuant was now applied to viral, bacterial, yeast, mouse, and  
16 human RNA to discover new cap structures, quantify m<sup>1</sup>A or m<sup>1</sup>Am in caps, and to define the  
17 composition and dynamics of the cap epitranscriptome.

### 18 **Quantitative analysis of the cap landscape in eukaryotic, prokaryotic, and viral RNA**

19 With an optimized CapQuant method in hand, we applied it to define the landscape of caps in  
20 coding and non-coding RNAs from a range of organisms, including humans, mice, yeast,  
21 bacteria, and an RNA virus. Focusing first on poly(A)-tailed RNAs (mainly mRNA) from log-  
22 growing human CCRF-SB lymphoblasts (**Figure 2A**), we were able to quantify the components  
23 of the cap epitranscriptome. Of the 26 targeted caps, 10 were reproducibly detected for a total  
24 of 2,078 fmol of caps per μg of RNA. As expected, the five cap 1 structures (m<sup>7</sup>GpppNm)

1 comprised the majority of all caps (88%, 1,830 fmol/ $\mu$ g RNA) with no cap 0 structures  
2 (m<sup>7</sup>GpppN) detected. Consistent with the fact that very few transcriptional start sites (TSS) in  
3 humans start with a uridine (**Figure 3A** and **Supplementary Figure S6b**), m<sup>7</sup>GpppUm  
4 comprised only 1% of second-nucleotide subtypes (**Figure 2A**), which ranged from 23 to 595  
5 fmol/ $\mu$ g RNA. The most abundant caps were the C, G and A subtypes, found in nearly equal  
6 proportions: 33% m<sup>7</sup>GpppCm, 32% m<sup>7</sup>GpppGm, and 19% m<sup>7</sup>Gpppm<sup>6</sup>Am/15% m<sup>7</sup>GpppAm. This  
7 distribution correlates strongly with the distribution of predicted TSS (+1 position) frequencies in  
8 humans (**Figure 3A** and **Supplementary Figure S6b**). Our analysis further revealed four  
9 previously undescribed cap structures (**Figure 1A**): m<sup>7</sup>Gpppm<sup>6</sup>A, FAD, UDP-Glc, and UDP-  
10 GlcNAc. The m<sup>7</sup>Gpppm<sup>6</sup>A structure proved to be relatively abundant at 12% of all mRNA caps  
11 (244 fmol/ $\mu$ g RNA), which contradicts previous claims of the absence of this cap based on crude  
12 thin-layer chromatography analyses (14) and in a non-quantitative LC-MS assay (18).  
13 Additionally, this cap demonstrates that 2'-O-methylation is not essential in mRNAs, as has  
14 been previously suggested to suppress innate host antiviral responses (3). The structures of the  
15 four metabolite caps (NAD, FAD, UDP-Glc and UDP-GlcNAc) were unequivocally confirmed by  
16 three signature MRM transitions defined with standards (**Figure 1E** and **Supplementary Figure**  
17 **S8**). Compared to cap 1 structures, however, the levels of these metabolite caps were ~100-fold  
18 lower at 0.40-2.9 fmol/ $\mu$ g RNA (**Figure 2A** and **Table 1**). UDP-GlcNAc and NAD being the two  
19 most abundant structures is consistent with the relative abundance of these metabolites in  
20 human cells (40,41) and thus with the idea that nucleotide metabolites can initiate transcription  
21 (9). Notably, we were unable to detect m<sup>7</sup>Gpppm<sup>1</sup>A or m<sup>7</sup>Gpppm<sup>1</sup>Am in human mRNAs  
22 (**Supplementary Figure S11**).

23 We next sought to understand whether the cap epitranscriptome is different in different cell  
24 types. The same 10 mRNA caps observed in the human cells were also found in mouse liver  
25 and kidney tissue mRNAs at 1,131 and 566 fmol/ $\mu$ g RNA, respectively. Mice similarly showed

1 relatively low abundance of m<sup>7</sup>GpppUm and high levels of m<sup>7</sup>GpppGm and m<sup>7</sup>GpppCm (**Figure**  
2 **2B** and **Table 1**), though m<sup>7</sup>GpppAm was >5-fold lower in mice liver and kidney than in human  
3 CCRF-SB cells (**Figure 2B** and **Table 1**). The large differences between the ratio of m<sup>7</sup>GpppAm  
4 and m<sup>7</sup>Gpppm<sup>6</sup>Am in different cell types supports a role for m<sup>6</sup>Am as a regulatable modification  
5 in mRNA. A comparison of caps in liver and kidney showed several striking tissue-specific  
6 differences, most notably the absence of detectable m<sup>7</sup>Gpppm<sup>6</sup>A in kidney (**Figure 2B** and  
7 **Table 1**). Other tissue-specific differences include >2-fold lower levels of m<sup>7</sup>GpppGm ( $p > 0.05$ ),  
8 m<sup>7</sup>GpppAm ( $p > 0.05$ ), m<sup>7</sup>Gpppm<sup>6</sup>Am ( $p < 0.05$ ), and UDP-Glc ( $p < 0.01$ ) in kidney compared to  
9 liver, and small variations in the levels of m<sup>7</sup>GpppCm, m<sup>7</sup>GpppUm, NAD, FAD and UDP-GlcNAc  
10 (**Figure 2B**). Similar to humans, the cap second nucleotide distribution correlates strongly with  
11 the distribution of predicted TSS frequencies in mice (**Figure 3B** and **Supplementary Figure**  
12 **S6c**).

13 In contrast to the cap 1 structures in mammalian cells, the only canonical caps in *S. cerevisiae*  
14 were the expected cap 0 structures (m<sup>7</sup>GpppN), with abundances between 20 and 1,524  
15 fmol/μg RNA (**Figure 2C** and **Table 1**). m<sup>7</sup>GpppA constituted 80% of all caps (1,896 fmol/μg),  
16 with m<sup>7</sup>GpppA > m<sup>7</sup>GpppG (16%) >> m<sup>7</sup>GpppU (1.5%) > m<sup>7</sup>GpppC (1.1%). This distribution  
17 correlates strongly with the distribution of predicted TSS frequencies in *S. cerevisiae* (**Figure 3C**  
18 and **Supplementary Figure S6d**). The four nucleotide metabolite caps were present in the *S.*  
19 *cerevisiae* mRNAs at abundances from 2.0 to 12.4 fmol/μg RNA, which is higher than in  
20 humans and mice (**Figure 2A-B** and **Table 1**). Notably, we found no evidence for the presence  
21 of methylated forms of A in any cap structures in yeast.

22 The tissue-specific variations in cap structure and quantity in mice raised the possibility that cap  
23 landscape would vary as a result of stress-specific changes in gene expression. To this idea, we  
24 quantified the cap profile in yeast exposed to well-characterized oxidative and alkylation

1 stresses caused by hydrogen peroxide (H<sub>2</sub>O<sub>2</sub>) and methyl methanesulfonate (MMS),  
2 respectively. Both treatments resulted in modest changes in the levels of several caps (**Figure**  
3 **2C**), with a significant increase in the level of UDP-GlcNAc cap ( $p < 0.01$ ). However, there were  
4 no striking changes in cap levels for these two stressors.

5 As expected, the m<sup>7</sup>G-type cap structures typical of eukaryotes were not detectable in the total  
6 RNA from *E. coli* (**Figure 2D** and **Table 1**). Here we analyzed total RNA instead of mRNA  
7 because of the low prevalence of polyA tails in the *E. coli* mRNA pool, with only 2-50% of  
8 mRNAs shown to have polyA that are generally short at 14-60 nt (42). While NAD and UDP-  
9 GlcNAc were the major metabolite caps, which is consistent with the relatively high  
10 concentration of these metabolites in *E. coli* (43), the four metabolite caps in *E. coli* occurred at  
11 10-fold lower levels than in yeast, ranging from 0.20 to 2.5 fmol/μg RNA (**Figure 2D** and **Table**  
12 **1**). This suggests differing propensities of the yeast and bacterial RNA polymerases for using  
13 nucleotide metabolites to initiate transcription.

14 Finally, in dengue purified virion RNA genomes, the total level of detected caps amounted to  
15  $325 \pm 114$  fmol/μg RNA. This is consistent with nearly all copies of the ~10,700 nt RNA genome  
16 (288 fmol/μg RNA) possessing a cap. The major cap structure (70%) was found to be the cap 1  
17 m<sup>7</sup>GpppAm at 226 fmol/μg RNA (**Figure 2E** and **Table 1**). Surprisingly, the cap 0 structure  
18 m<sup>7</sup>GpppA represented 14% of all caps. The abundance of the four metabolite caps ranged from  
19 2.5 to 44.8 fmol/μg RNA, which is similar to yeast.

20

## 21 **DISCUSSION**

22 Here we present CapQuant, an analytical method combining off-line HPLC enrichment with  
23 isotope-dilution LC-MS/MS analysis for analysis of the diversity and dynamics of the cap

1 epitranscriptome. This method overcomes the shortcomings of existing cap analysis tools,  
2 which are limited to individual cap structures (20,44,45), are poorly quantitative (5,14,18), and  
3 lack of chemical specificity (5,14), to enable accurate, specific and sensitive quantification of the  
4 RNA cap landscape in any organism. It achieves high-coverage with absolute quantification – a  
5 key feature of the method – over a broad dynamic range starting at attomole levels (as little as  
6 600 ng of RNA) and the capacity to expand to other new RNA cap structures, including the  
7 methylated guanosine caps observed in pre-tRNA (21). While isotope-labeled internal standards  
8 provide highly accurate absolute quantification, rigorous cap quantification can still be  
9 performed with external calibration curves using unlabeled standards or even with other  
10 chemically similar cap standards. The use of off-line ion-pairing HPLC (46) for cap enrichment  
11 (**Figure 1B**) greatly enhances quantitative sensitivity by reducing interference from the matrix  
12 and non-cap nucleotides. It further helps in new cap discoveries akin to DNA “adductomics” (47)  
13 by collecting ion-pairing HPLC fractions across the elution time-course and analyzing them by  
14 MS scanning for novel MS signals. However, as the use of ion-pairing agents involves chronic  
15 contamination of HPLC and MS systems, a dedicated HPLC system and volatile ion-pairing  
16 agents for its complete removal before LC-MS/MS analysis is recommended.

17 Application of CapQuant to eukaryotic and flavivirus RNA has demonstrated that the  
18 composition of RNA caps varies between different tissues, supporting the idea of a regulated  
19 cap epitranscriptome. In addition, our data (i) quantitatively confirmed previous qualitative  
20 observations about the predominance of m<sup>7</sup>G-type caps, (ii) confirmed the lack of GpppN caps,  
21 and (iii) facilitated the discovery of novel and noncanonical caps, such as the metabolite caps  
22 (10,12,48), (iv) suggest that cap m<sup>1</sup>A/m<sup>1</sup>Am is unlikely to be present at appreciable levels in  
23 mRNA caps, raising a warning on interpreting any data on m<sup>1</sup>A/m<sup>1</sup>Am in RNA, (v) revealed the  
24 occurrence of surprisingly high proportions of caps lacking 2'-O-methylation in mammalian  
25 mRNA and viral RNA genome, and (vi) facilitated transcription start site analysis.



1 The lack of detectable GpppN caps could reflect the cap quality control system described in  
2 mammalian (DXO/Dom3Z protein) and yeast cells (Rai1–Rat1 and Dxo1). These systems  
3 possess decapping, pyrophosphohydrolase, and 5'-to-3' exonuclease activities that appear to  
4 target caps lacking m<sup>7</sup>G (49,50).

5 With regard to m<sup>1</sup>A, two antibody-based methods concluded that m<sup>1</sup>A was widespread in  
6 mammalian mRNA (36,37), with subsequent studies proposing that m<sup>1</sup>A could exist as part of a  
7 novel cap structure comprising m<sup>7</sup>Gpppm<sup>1</sup>A or m<sup>7</sup>Gpppm<sup>1</sup>Am (39). However, biochemical  
8 studies were not used to demonstrate the existence of these novel mRNA caps. Another study  
9 used an antibody and sequencing-based approach to detect m<sup>1</sup>A-induced reverse transcriptase  
10 errors and suggested that m<sup>1</sup>A was present at much lower levels than previously thought (38).  
11 Here we demonstrate that m<sup>1</sup>A is unlikely to be present at appreciable levels in mRNA caps, as  
12 least in cultured human lymphoblasts. Even after quantitatively accounting for artifactual loss of  
13 m<sup>1</sup>A by Dimroth rearrangement to m<sup>6</sup>A and optimizing the CapQuant method to minimize this  
14 conversion, we did not detect any m<sup>7</sup>GpppN or m<sup>7</sup>GpppNm caps containing m<sup>1</sup>A or m<sup>1</sup>Am. Our  
15 data suggest that the levels of m<sup>1</sup>A and m<sup>1</sup>Am at mRNA caps, if they exist, are below the LODs  
16 which are 0.68 fmol and 0.11 fmol respectively. Thus, although this study does not rule out the  
17 existence of m<sup>1</sup>A/m<sup>1</sup>Am at mRNA caps, they are below the limits of detection, which suggests  
18 that they, if present, are found in less than 1/16,000 and 1/100,000 mRNA transcripts  
19 respectively from cultured human lymphoblasts. It should be noted that we did not attempt to  
20 solve the Dimroth rearrangement problem, thus we cannot be sure about the cap m<sup>1</sup>A/m<sup>1</sup>Am  
21 status. However, our observations raise a warning on interpreting any data on m<sup>1</sup>A/m<sup>1</sup>Am in  
22 RNA. While previous sequencing-based methods reported about a couple dozens of cap m<sup>1</sup>A in  
23 the HEK293T cells (38), the existence of cap m<sup>1</sup>A/m<sup>1</sup>Am in different tissues or samples needs  
24 further investigation.



1 In terms of novel cap discovery, we detected m<sup>7</sup>Gpppm<sup>6</sup>A as a novel cap in mRNA from human  
2 cells and mouse liver (**Figure 2A-B** and **Table 1**). The presence of m<sup>7</sup>Gpppm<sup>6</sup>A in mouse liver  
3 but not kidney points to a tissue-specific role for this cap. This could arise by demethylation of  
4 the m<sup>7</sup>Gpppm<sup>6</sup>Am cap through a yet unknown demethylase, or by N<sup>6</sup>-methylation of adenosine  
5 at the first transcribed nucleotide in mRNAs independent of the adenosine 2'-O-methylation  
6 status. Indeed, recent *in vitro* biochemical studies have shown that PCIF1, the enzyme  
7 responsible for synthesis of m<sup>6</sup>Am in mRNA caps, can also act on m<sup>7</sup>GpppA-capped mRNA to  
8 form m<sup>7</sup>Gpppm<sup>6</sup>A-capped mRNA (18,51,52). Thus, in cells, m<sup>7</sup>GpppA caps might undergo either  
9 2'-O-methylation, N<sup>6</sup>-methylation, or both.

10 CapQuant also expanded the repertoire of 5' cap structures with the discovery of three novel  
11 metabolite caps (FAD, UDP-Glc and UDP-GlcNAc) in all the RNA species analyzed (**Figures 1**  
12 **and 2**). This expands the generality of the idea that nucleotide metabolites can serve as caps in  
13 cellular and viral RNA (2). However, metabolite caps (NAD, FAD, UDP-Glc and UDP-GlcNAc)  
14 are rare in eukaryotes, accounting for 0.3-5.1% in total of all caps detected (**Figure 2** and **Table**  
15 **1**) across eukaryotic cells and tissues. There is a strong stochastic basis for metabolite caps  
16 formation due to (i) their low abundance relative to the NpppN canonical caps in eukaryotes  
17 (>10-fold lower; 0.2-20 fmol/μg *versus* 10-600 fmol/μg), (ii) the similar frequencies of each cap  
18 type in all organisms, (iii) the variation in metabolite cap levels among tissues and stresses, and  
19 (iv) their proportionality to cellular metabolite pools. The role of nutrient availability and  
20 metabolite pools as determinants of metabolite cap levels is illustrated by several studies. First,  
21 it was shown by Walters *et al.* (53) that there were more NAD-capped mRNAs in *S. cerevisiae*  
22 grown in minimal medium compared to rich YEPD medium, which suggests that the levels of  
23 NAD caps are sensitive to nutrient status. Similarly, Canelas *et al.* found that NAD levels in *S.*  
24 *cerevisiae* are sensitive to culturing conditions and nutrient status (54). This variability in  
25 metabolite levels as a determinant of metabolite cap levels may explain the 33-fold difference in

1 NAD caps observed here and in the studies of Grudzien-Nagolska *et al.* in *S. cerevisiae* (45),  
2 though contributions from the different analytical methods could also account for the different  
3 NAD cap levels. Finally, Grudzien-Nagolska *et al.* demonstrated that changes in cellular NAD  
4 levels in HEK293T cells correlate with changes of the levels of NAD caps (45). These studies all  
5 show a variability in metabolite cap levels based on metabolite pool levels in a way that  
6 suggests a potential signaling or regulatory function of metabolite caps. An emerging literature  
7 supports this idea. For example, the NAD cap has been shown to be present on a subset of  
8 mRNAs that are targeted for rapid decay in mammalian cells (11,55), while Kiledjian and  
9 coworkers have observed a post-transcriptional NAD capping activity, which suggests that this  
10 cap is not simply a transcriptional mistake (11).

11 The potential for variation in metabolite cap levels as a function of cell state is also illustrated  
12 with viral infections. For example, human cytomegalovirus (HCMV) infection upregulates UDP-  
13 GlcNAc levels in host cells (56) with similar metabolic shifts observed in other viruses (57,58).  
14 Hence it is proposed that dengue infection upregulates host cellular UDP-GlcNAc levels,  
15 especially since viral envelope (E) protein *N*-glycosylation is partly derived from UDP-GlcNAc in  
16 host cells (59,60). Higher host cell levels of UDP-GlcNAc may lead to increased transcription  
17 initiation with this nucleotide metabolite, which would explain the relatively large proportion of  
18 UDP-GlcNAc-capped viral transcripts detected in dengue purified virions (**Figure 2E** and **Table**  
19 **1**). While the biological function of these metabolite caps requires further examination, RNA  
20 Pols appear to be capable of initiating transcription with the four nucleotide metabolites studied  
21 here and that dengue virus NS5 polymerase could initiate transcription with the metabolite caps  
22 in the same manner as the host RNA Pol. However, the ability of the metabolite-capped viral  
23 genomes to sustain viral replication is unknown. In addition to the above question regarding  
24 biological function, the discovery of the three novel metabolite caps also raises several other  
25 important questions. For example, can metabolite caps be exported from the nucleus into the

1 cytoplasm in eukaryotic cells? Are metabolite caps found in RNAs that associate with  
2 polysomes? We think that answers to these questions can be readily obtained by directly  
3 applying CapQuant to relevant systems, i.e., RNA preparations from the nucleus and cytoplasm  
4 from the same population of cells, and polysome-bound RNAs.

5 Consistent with published observations, we found that the cap on the dengue RNA genome  
6 isolated from purified virions contained Am but not m<sup>6</sup>Am (**Figure 2E** and **Table 1**) as compared  
7 with human mRNA (12,61). CapQuant revealed that >30% of the viral particles generated  
8 during an infection possess caps that are counterproductive for viral replication and survival in  
9 the host: presumably untranslatable metabolite caps or the m<sup>7</sup>GpppA cap that activates innate  
10 immunity (**Figure 2E**). With an estimated single copy of the RNA genome per viral particle (62)  
11 and one viral particle infecting a host cell, the varying viral cap structures detected suggest that  
12 infections will occur with viral genomes having different translational efficiency or propensity to  
13 activate the antiviral response pathways. The fate of these variously capped viral genomes in  
14 the host is largely known. Indeed, there is controversy concerning the presence of m<sup>6</sup>Am in the  
15 caps on dengue-derived mRNAs isolated from infected cells, which presumably arise by  
16 replication of the infective genomic RNA (12,61,63). The sole published experimental work  
17 showed that only Am is found in dengue mRNA caps (63). The variable detection of m<sup>6</sup>Am in  
18 dengue mRNA caps could be explained by contamination with the abundance of host mRNA  
19 containing m<sup>6</sup>Am (**Figure 2A** and **Table 1**) or by N<sup>6</sup>-methylation of viral genomes and/or mRNA  
20 by host enzymes PCIF1 (18,51,52). Our observation that dengue genomic RNA present in  
21 purified virions lacks m<sup>6</sup>Am in the cap implies that any N<sup>6</sup>-methylation of Am in caps, if required  
22 for translation, must occur in viral transcripts used for protein production. However, replicated  
23 RNA genomes destined for virion assemblies can only possess m<sup>7</sup>GpppAm, m<sup>7</sup>GpppA, and the  
24 metabolite caps, as we observed (**Figure 2E** and **Table 1**). While some studies suggest that  
25 cap m<sup>6</sup>Am stabilizes a subset of mRNAs (24), other studies did not observe this effect

1 (18,64,65). Interestingly,  $N^6$ -methylation of A within the viral mRNA has been found to negatively  
2 regulate viral infection by reducing viral particle formation (66), while we have previously  
3 demonstrated that Am is present throughout the RNA genome of purified dengue virions (23).  
4 Clearly, there is significant work to be done to clarify the capping mechanisms involved in the  
5 various steps of viral infection.

6 CapQuant also showed that 14% of dengue genomes possess  $m^7GpppA$  cap, and that 12% of  
7 human and 3% of mouse liver mRNAs possess  $m^7Gpppm^6A$  caps (**Figure 2** and **Table 1**).  
8 Although the observation of the latter stands in contrast to the inability to detect it in a crude,  
9 chemically-non-specific TLC method (5) or in insensitive LC-MS studies lacking standards (18),  
10 the detection of  $m^7Gpppm^6A$  caps is rigorously established here based on chromatographic and  
11 structural identity with a synthetic standard. The presence of  $m^7Gpppm^6A$  caps in human and  
12 mouse liver mRNAs is unlikely due to inefficient cellular 2'-O-methyltransferase activities or  
13 insufficient cellular innate immunity targeting cap 0 structures (67) since none of the other cap 0  
14 structures were detectable in these RNAs, even in human CCRF-SB mRNA where the levels of  
15  $m^7GpppCm$ ,  $m^7GpppGm$  and  $m^7GpppAm$  were almost twice or comparable to the level of  
16  $m^7Gpppm^6Am$  (**Figure 2** and **Table 1**). Thus, these data suggest that at least in some cell types  
17 2'-O-methylation is not present in all mRNAs, potentially suggesting that there may be specific  
18 cellular contexts in which 2'-O-methylation is not needed to suppress the innate host antiviral  
19 response (3). It is well established that RIG-I and MDA5 are sensors of non-self RNA in  
20 mammalian cells, and the IFIT complex is a dual sensor-effector of a cellular innate defense  
21 system (67) for caps without 2'-O-methylation. IFIT complex recognizes  $m^7GpppA$  cap  
22 structures to inhibit translation of the viral genome during viral infection (3) while RIG-I binds to  
23 dsRNA with 5'-ppp and cap 0 (68). 2'-O-methylated caps (5'-pppNm and  $m^7GpppNm$ )  
24 significantly reduces RIG-I binding affinity to target RNA and the innate defense system  
25 activation (68). This raises an important question: Does the proportion of  $m^7GpppA$  caps

1 present during a dengue infection correlate with virulence? It is reasonable to hypothesize that  
2 the more virulent dengue strains have evolved to minimize the proportion of m<sup>7</sup>GpppA caps that  
3 activate the innate antiviral response in host cells, a hypothesis readily tested by application of  
4 CapQuant to clinical dengue isolates replicated in culture. It is worth noting that previous efforts  
5 using two-dimensional TLC- or LC-MS-based methods did not detect m<sup>7</sup>Gpppm<sup>6</sup>A cap in mRNA  
6 from human cells (5,18). Although it is possible that m<sup>7</sup>Gpppm<sup>6</sup>A cap was indeed absent in  
7 those RNA preparations, the failure to detect this cap could also be due to lack of chemical  
8 specificity and insufficient sensitivity of the two-dimensional TLC method (5) or due to lack of  
9 sensitivity and selected monitoring of m<sup>7</sup>G-capped dimers (m<sup>7</sup>GpppN<sub>1</sub>Gp) to pentamers  
10 (m<sup>7</sup>GpppN<sub>1</sub>N<sub>2</sub>N<sub>3</sub>N<sub>4</sub>Gp) containing 0-3 methyl groups, which include only a portion of all possible  
11 m<sup>7</sup>G-capped sequences with A or methylated A as the first transcribed nucleotide, in the LC-MS  
12 method (18). Interestingly, the level of m<sup>7</sup>Gpppm<sup>6</sup>A cap in mRNA differed significantly among  
13 human CCRF-SB, mouse liver and mouse kidney (**Figure 2A-B**). To explore if these differences  
14 is linked to possible differences in expression of relevant cap modification enzymes, we  
15 assessed the relative expression of a selection of RNA cap modification enzymes including  
16 PCIF1, FTO, DCP2 and CMTR1 as well as ALKBH5 in the total RNA from CCRF-SB cells and  
17 mouse liver and kidney tissues on the transcription level by RT-qPCR. We observed no  
18 statistically significant difference between any two of these three samples in the relative  
19 expression of any enzyme examined (**Supplementary Figure S12**), suggesting that the  
20 differences in the level of m<sup>7</sup>Gpppm<sup>6</sup>A cap are likely due to other factors. We speculate that two  
21 such factors are secondary structure of 5' ends of mRNAs (69) and helicase activity that is  
22 critical for CMTR1-mediated 2'-O-methylation of cap 1 in mRNAs harboring highly structured 5'  
23 ends (70). Further studies are needed to fully address this question.

24 CapQuant analysis also provided strong corroboration for TSS studies, which are challenging  
25 due to the lack of long and conserved consensus sequences for TSSs. m<sup>7</sup>G caps with a purine

1 as the first transcribed nucleotide represented the major caps found in mRNAs from human  
2 CCRF-SB (70%), mouse liver (82%) and kidney (74%) tissues, and *S. cerevisiae* W1588-4C  
3 (97%), with the relative abundance of different m<sup>7</sup>GpppNm's or m<sup>7</sup>GpppN's varying across the  
4 organisms and tissues (**Figure 2A-C** and **Table 1**). This preference for purines at the  
5 penultimate position in m<sup>7</sup>GpppN caps is rationalized by the strong preference for pyrimidine-  
6 purine dinucleotides at -1 and +1 positions of TSSs in the coding strand of eukaryotes, bacteria  
7 and some viruses, which is argued to facilitate the loading of ATP or GTP during transcription  
8 initiation (72-74). A comparison of the distribution of the second nucleotide in  
9 m<sup>7</sup>GpppN/m<sup>7</sup>GpppNm caps revealed by CapQuant to the distribution of TSSs (+1 position)  
10 predicted using the cap analysis gene expression (CAGE) method (29,75) was conducted for  
11 cross-validation. The CAGE method is advantageous over other TSS analysis methods in that it  
12 only captures capped transcripts and thus avoids false TSSs from degraded transcripts that do  
13 not contain caps. We observed a strong correlation between the cap second nucleotide  
14 distribution and the TSS distribution for *S. cerevisiae*, mice and humans (**Figure 3A-C** and  
15 **Supplementary Figure S6b-d**).

16 CapQuant is not without limitations. For example, the level of all caps per µg of mRNA in the  
17 mouse tissues was about 2- to 4-fold lower than in human cells and yeast. (**Table 1**). We cannot  
18 explain it, but could be due to presence of other types of caps not quantified in the present  
19 studies or a higher proportion of uncapped RNAs in the mouse tissue mRNA preparations. It is  
20 unlikely due to rRNA contamination as the Bioanalyzer profiles of all the cell and tissue mRNA  
21 preparations indicated undetectable level of rRNA contamination (**Supplementary Figure S4**).  
22 Also, it should be noted that in human, *S. cerevisiae* and *E. coli* cells, the levels of NAD cap  
23 revealed in the present study (**Table 1**) are up to 55-fold lower than those levels of the same  
24 cap determined or estimated in other studies (20,45). In addition to the variable accuracy of the  
25 different analytical methods, lower levels of NAD detection in the present studies could be due,

1 at least in part, to differences in the cell culture conditions (45,53,54) and cell strains used in the  
2 different studies, as discussed earlier. In the case of *E. coli*, we analyzed caps in stationary-  
3 phase cells whereas Chen *et al.* analyzed caps in log-phase *E. coli* (20), which could contribute  
4 to the lower NAD cap level observed in our study. In addition, the non-significant changes in the  
5 abundance of NAD in the control experiments by Chen *et al.* (20) when spiking large amounts of  
6 NAD into the cell lysate prior to RNA isolation cannot rule out the possibility that the NAD they  
7 detected in the samples represented contaminating non-covalently bound NAD. CapQuant  
8 employs isotopically-labeled internal standards for cap quantification, which enhances the  
9 accuracy of the method.

10 In summary, beyond the applications in the quantification of cap structures in any type of RNA  
11 from *in vivo* or *in vitro* sources, CapQuant has wide potential use in many biological fields.  
12 Primarily, it can facilitate investigations into the dynamics, function and regulation of RNA caps  
13 in a broad wide range of biological processes and conditions. In addition, it can be readily  
14 applied to study RNA metabolism, such as RNA capping, RNA decapping and RNA decay.  
15 Notably, when combined with transcript-specific purification technology (76), it enables  
16 quantification of cap structures in specific transcripts and thus studies of transcript-specific  
17 capping and decapping, and gene-specific regulation. Finally, it permits investigations into the  
18 roles that cap-binding proteins, such as eIF4E and CBC, may play in the control of gene  
19 expression (77).

20

## 21 **SUPPLEMENTARY DATA**

22 Supplementary Data are available online.

23

## 24 **ACKNOWLEDGEMENTS**

1 We thank Profs. Graham Walker and Jianzhu Chen from the Massachusetts Institute of  
2 Technology for generously sharing *S. cerevisiae* W1588-4C and human CCRF-SB cells,  
3 respectively.

4

## 5 **FUNDING**

6 This work was supported by grants from the National Institutes of Health (ES022858 to P.C.D.  
7 and CA186702 to S.R.J.), the Singapore-MIT Alliance for Research and Technology with a  
8 grant from the National Research Foundation of Singapore, the Inner Mongolia University with a  
9 grant from its “Steed Plan” High-Level Talents Program (awarded to J.W.), and the Nanyang  
10 Presidential Graduate Scholarship (B.L.A.C.).

11 *Conflict of interest statement.* None declared.

12

## 13 **REFERENCES**

- 14 1. Helm, M. and Alfonzo, J.D. (2014) Posttranscriptional RNA Modifications: playing  
15 metabolic games in a cell's chemical Legoland. *Chem. Biol.*, **21**, 174-185.
- 16 2. Ramanathan, A., Robb, G.B. and Chan, S.H. (2016) mRNA capping: biological functions  
17 and applications. *Nucleic Acids Res.*, **44**, 7511-7526.
- 18 3. Hyde, J.L. and Diamond, M.S. (2015) Innate immune restriction and antagonism of viral  
19 RNA lacking 2-O methylation. *Virology*, **479-480**, 66-74.
- 20 4. Kastern, W.H. and Berry, S.J. (1976) Non-methylated guanosine as 5' terminus of  
21 capped messenger-rna from insect oocytes. *Biochem. Biophys. Res. Commun.*, **71**, 37-  
22 44.
- 23 5. Wei, C., Gershowitz, A. and Moss, B. (1975) N<sup>6</sup>, O<sup>2</sup>-dimethyladenosine a novel  
24 methylated ribonucleoside next to the 5' terminal of animal cell and virus mRNAs. *Nature*,  
25 **257**, 251-253.



- 1 6. HsuChen, C.C. and Dubin, D.T. (1976) Di- and trimethylated congeners of 7-  
2 methylguanine in Sindbis virus mRNA. *Nature*, **264**, 190-191.
- 3 7. Byszewska, M., Smietanski, M., Purta, E. and Bujnicki, J.M. (2014) RNA  
4 methyltransferases involved in 5' cap biosynthesis. *RNA Biol.*, **11**, 1597-1607.
- 5 8. Bird, J.G., Zhang, Y., Tian, Y., Panova, N., Barvik, I., Greene, L., Liu, M., Buckley, B.,  
6 Krasny, L., Lee, J.K. *et al.* (2016) The mechanism of RNA 5' capping with NAD<sup>+</sup>, NADH  
7 and desphospho-CoA. *Nature*, **535**, 444-447.
- 8 9. Julius, C. and Yuzenkova, Y. (2017) Bacterial RNA polymerase caps RNA with various  
9 cofactors and cell wall precursors. *Nucleic Acids Res.*, **45**, 8282-8290.
- 10 10. Jaschke, A., Hofer, K., Nubel, G. and Frindert, J. (2016) Cap-like structures in bacterial  
11 RNA and epitranscriptomic modification. *Curr. Opin. Microbiol.*, **30**, 44-49.
- 12 11. Kiledjian, M. (2018) Eukaryotic RNA 5'-End NAD<sup>+</sup> Capping and DeNADding. *Trends Cell*  
13 *Biol.*, **28**, 454-464.
- 14 12. Furuichi, Y. (2015) Discovery of m<sup>7</sup>G-cap in eukaryotic mRNAs. *Proc. Jpn. Acad. Ser. B*,  
15 **91**, 394-409.
- 16 13. Shatkin, A.J. (1976) Capping of eucaryotic mRNAs. *Cell*, **9**, 645-653.
- 17 14. Wei, C.M., Gershowitz, A. and Moss, B. (1976) 5'-Terminal and internal methylated  
18 nucleotide sequences in HeLa cell mRNA. *Biochemistry*, **15**, 397-401.
- 19 15. Cleaver, J.E. and Burki, H.J. (1974) Letter: Biological damage from intranuclear carbon-  
20 14 decays: DNA single-strand breaks and repair in mammalian cells. *Int. J. Radiat. Biol.*  
21 *Relat. Stud. Phys. Chem. Med.*, **26**, 399-403.
- 22 16. Minor, R.R. (1982) Cytotoxic effects of low levels of <sup>3</sup>H-, <sup>14</sup>C-, and <sup>35</sup>S-labeled amino  
23 acids. *J. Biol. Chem.*, **257**, 10400-10413.
- 24 17. Abdelhamid, R.F., Plessy, C., Yamauchi, Y., Taoka, M., de Hoon, M., Gingeras, T.R.,  
25 Isobe, T. and Carninci, P. (2014) Multiplicity of 5' cap structures present on short RNAs.  
26 *PLoS One*, **9**, e102895.

- 1 18. Akichika, S., Hirano, S., Shichino, Y., Suzuki, T., Nishimasu, H., Ishitani, R., Sugita, A.,  
2 Hirose, Y., Iwasaki, S., Nureki, O. *et al.* (2019) Cap-specific terminal N<sup>6</sup>-methylation of  
3 RNA by an RNA polymerase II-associated methyltransferase. *Science*, **363**, eaav0080.
- 4 19. Beverly, M., Dell, A., Parmar, P. and Houghton, L. (2016) Label-free analysis of mRNA  
5 capping efficiency using RNase H probes and LC-MS. *Anal. Bioanal. Chem.*, **408**, 5021-  
6 5030.
- 7 20. Chen, Y.G., Kowtoniuk, W.E., Agarwal, I., Shen, Y. and Liu, D.R. (2009) LC/MS analysis  
8 of cellular RNA reveals NAD-linked RNA. *Nat. Chem. Biol.*, **5**, 879-881.
- 9 21. Ohira, T. and Suzuki, T. (2016) Precursors of tRNAs are stabilized by methylguanosine  
10 cap structures. *Nat. Chem. Biol.*, **12**, 648-655.
- 11 22. Peyrane, F., Selisko, B., Decroly, E., Vasseur, J.J., Benarroch, D., Canard, B. and  
12 Alvarez, K. (2007) High-yield production of short GpppA- and (7Me)GpppA-capped  
13 RNAs and HPLC-monitoring of methyltransfer reactions at the guanine-N7 and  
14 adenosine-2' O positions. *Nucleic Acids Res.*, **35**, e26.
- 15 23. Dong, H., Chang, D.C., Hua, M.H., Lim, S.P., Chionh, Y.H., Hia, F., Lee, Y.H., Kukkaro,  
16 P., Lok, S.M., Dedon, P.C. *et al.* (2012) 2'-O methylation of internal adenosine by  
17 flavivirus NS5 methyltransferase. *PLoS Pathog.*, **8**, e1002642.
- 18 24. Mauer, J., Luo, X., Blanjoie, A., Jiao, X., Grozhik, A.V., Patil, D.P., Linder, B., Pickering,  
19 B.F., Vasseur, J.J., Chen, Q. *et al.* (2017) Reversible methylation of m(6)Am in the 5'  
20 cap controls mRNA stability. *Nature*, **541**, 371-375.
- 21 25. Wang, J., Dong, H., Chionh, Y.H., McBee, M.E., Sirirungruang, S., Cunningham, R.P.,  
22 Shi, P.Y. and Dedon, P.C. (2016) The role of sequence context, nucleotide pool balance  
23 and stress in 2'-deoxynucleotide misincorporation in viral, bacterial and mammalian RNA.  
24 *Nucleic Acids Res.*, **44**, 8962-8975.

- 1 26. Kodzius, R., Kojima, M., Nishiyori, H., Nakamura, M., Fukuda, S., Tagami, M., Sasaki, D.,  
2 Imamura, K., Kai, C., Harbers, M. *et al.* (2006) CAGE: cap analysis of gene expression.  
3 *Nat. Methods*, **3**, 211-222.
- 4 27. Kanamori-Katayama, M., Itoh, M., Kawaji, H., Lassmann, T., Katayama, S., Kojima, M.,  
5 Bertin, N., Kaiho, A., Ninomiya, N., Daub, C.O. *et al.* (2011) Unamplified cap analysis of  
6 gene expression on a single-molecule sequencer. *Genome Res.*, **21**, 1150-1159.
- 7 28. Carninci, P., Kvam, C., Kitamura, A., Ohsumi, T., Okazaki, Y., Itoh, M., Kamiya, M.,  
8 Shibata, K., Sasaki, N., Izawa, M. *et al.* (1996) High-efficiency full-length cDNA cloning  
9 by biotinylated CAP trapper. *Genomics*, **37**, 327-336.
- 10 29. Lu, Z. and Lin, Z. (2018) Pervasive and dynamic transcription initiation in  
11 *Saccharomyces cerevisiae*. *bioRxiv*.
- 12 30. Lizio, M., Harshbarger, J., Shimoji, H., Severin, J., Kasukawa, T., Sahin, S.,  
13 Abugessaisa, I., Fukuda, S., Hori, F., Ishikawa-Kato, S. *et al.* (2015) Gateways to the  
14 FANTOM5 promoter level mammalian expression atlas. *Genome Biol.*, **16**, 22.
- 15 31. Lizio, M., Harshbarger, J., Abugessaisa, I., Noguchi, S., Kondo, A., Severin, J., Mungall,  
16 C., Arenillas, D., Mathelier, A., Medvedeva, Y.A. *et al.* (2017) Update of the FANTOM  
17 web resource: high resolution transcriptome of diverse cell types in mammals. *Nucleic  
18 Acids Res.*, **45**, D737-D743.
- 19 32. Afgan, E., Baker, D., Batut, B., van den Beek, M., Bouvier, D., Cech, M., Chilton, J.,  
20 Clements, D., Coraor, N., Gruning, B.A. *et al.* (2018) The Galaxy platform for accessible,  
21 reproducible and collaborative biomedical analyses: 2018 update. *Nucleic Acids Res.*,  
22 **46**, W537-W544.
- 23 33. Quinlan, A.R. and Hall, I.M. (2010) BEDTools: a flexible suite of utilities for comparing  
24 genomic features. *Bioinformatics*, **26**, 841-842.
- 25 34. Vandesompele, J., De Preter, K., Pattyn, F., Poppe, B., Van Roy, N., De Paepe, A. and  
26 Speleman, F. (2002) Accurate normalization of real-time quantitative RT-PCR data by

- 1           geometric averaging of multiple internal control genes. *Genome biology*, **3**,  
2           RESEARCH0034-RESEARCH0034.
- 3   35.    Abraham, G., Rhodes, D.P. and Banerjee, A.K. (1975) The 5' terminal structure of the  
4           methylated mRNA synthesized in vitro by vesicular stomatitis virus. *Cell*, **5**, 51-58.
- 5   36.    Dominissini, D., Nachtergaele, S., Moshitch-Moshkovitz, S., Peer, E., Kol, N., Ben-Haim,  
6           M.S., Dai, Q., Di Segni, A., Salmon-Divon, M., Clark, W.C. *et al.* (2016) The dynamic  
7           N(1)-methyladenosine methylome in eukaryotic messenger RNA. *Nature*, **530**, 441-446.
- 8   37.    Li, X., Xiong, X., Wang, K., Wang, L., Shu, X., Ma, S. and Yi, C. (2016) Transcriptome-  
9           wide mapping reveals reversible and dynamic N(1)-methyladenosine methylome. *Nat.*  
10          *Chem. Biol.*, **12**, 311-316.
- 11 38.    Safra, M., Sas-Chen, A., Nir, R., Winkler, R., Nachshon, A., Bar-Yaacov, D., Erlacher, M.,  
12          Rossmannith, W., Stern-Ginossar, N. and Schwartz, S. (2017) The m1A landscape on  
13          cytosolic and mitochondrial mRNA at single-base resolution. *Nature*, **551**, 251-255.
- 14 39.    Li, X., Xiong, X., Zhang, M., Wang, K., Chen, Y., Zhou, J., Mao, Y., Lv, J., Yi, D., Chen,  
15          X.W. *et al.* (2017) Base-Resolution Mapping Reveals Distinct m(1)A Methylome in  
16          Nuclear- and Mitochondrial-Encoded Transcripts. *Mol. Cell*, **68**, 993-1005 e1009.
- 17 40.    Namboori, S.C. and Graham, D.E. (2008) Enzymatic analysis of uridine diphosphate N-  
18          acetyl-D-glucosamine. *Anal. Biochem.*, **381**, 94-100.
- 19 41.    Yang, H., Yang, T., Baur, J.A., Perez, E., Matsui, T., Carmona, J.J., Lamming, D.W.,  
20          Souza-Pinto, N.C., Bohr, V.A., Rosenzweig, A. *et al.* (2007) Nutrient-sensitive  
21          mitochondrial NAD<sup>+</sup> levels dictate cell survival. *Cell*, **130**, 1095-1107.
- 22 42.    Sarkar, N. (1997) Polyadenylation of mRNA in prokaryotes. *Annu. Rev. Biochem.*, **66**,  
23          173-197.
- 24 43.    Bennett, B.D., Kimball, E.H., Gao, M., Osterhout, R., Van Dien, S.J. and Rabinowitz, J.D.  
25          (2009) Absolute metabolite concentrations and implied enzyme active site occupancy in  
26          Escherichia coli. *Nat. Chem. Biol.*, **5**, 593-599.

- 1 44. Cahova, H., Winz, M.-L., Höfer, K., Nübel, G. and Jäschke, A. (2015) NAD captureSeq  
2 indicates NAD as a bacterial cap for a subset of regulatory RNAs. *Nature*, **519**, 374-377.
- 3 45. Grudzien-Nogalska, E., Bird, J.G., Nickels, B.E. and Kiledjian, M. (2018) "NAD-capQ"  
4 detection and quantitation of NAD caps. *RNA*, **24**, 1418-1425.
- 5 46. Liu, S. and Wang, Y. (2015) Mass spectrometry for the assessment of the occurrence  
6 and biological consequences of DNA adducts. *Chem. Soc. Rev.*, **44**, 7829-7854.
- 7 47. Balbo, S., Turesky, R.J. and Villalta, P.W. (2014) DNA adductomics. *Chem. Res.*  
8 *Toxicol.*, **27**, 356-366.
- 9 48. Ghosh, A. and Lima, C.D. (2010) Enzymology of RNA cap synthesis. *Wiley Interdiscip.*  
10 *Rev. RNA*, **1**, 152-172.
- 11 49. Jiao, X., Xiang, S., Oh, C., Martin, C.E., Tong, L. and Kiledjian, M. (2010) Identification  
12 of a quality-control mechanism for mRNA 5'-end capping. *Nature*, **467**, 608-611.
- 13 50. Jiao, X., Chang, J.H., Kilic, T., Tong, L. and Kiledjian, M. (2013) A mammalian pre-  
14 mRNA 5' end capping quality control mechanism and an unexpected link of capping to  
15 pre-mRNA processing. *Mol. Cell*, **50**, 104-115.
- 16 51. Boulias, K., Toczyłowska-Socha, D., Hawley, B., Liberman-Isakov, N., Takashima, K.,  
17 Zaccara, S., Guez, T., Vasseur, J.-J., Debart, F., Aravind, L. *et al.* (2018) Identification of  
18 the m<sup>6</sup>Am methyltransferase PCIF1 reveals the location and functions of m<sup>6</sup>Am in the  
19 transcriptome. *bioRxiv*.
- 20 52. Sun, H., Zhang, M., Li, K., Bai, D. and Yi, C. (2019) Cap-specific, terminal N<sup>6</sup>-  
21 methylation by a mammalian m<sup>6</sup>Am methyltransferase. *Cell Res.*, **29**, 80-82.
- 22 53. Walters, R.W., Matheny, T., Mizoue, L.S., Rao, B.S., Muhlrad, D. and Parker, R. (2017)  
23 Identification of NAD<sup>+</sup> capped mRNAs in *Saccharomyces cerevisiae*. *Proc. Natl. Acad.*  
24 *Sci. USA*, **114**, 480-485.

- 1 54. Canelas, A.B., van Gulik, W.M. and Heijnen, J.J. (2008) Determination of the cytosolic  
2 free NAD/NADH ratio in *Saccharomyces cerevisiae* under steady-state and highly  
3 dynamic conditions. *Biotechnol. Bioeng.*, **100**, 734-743.
- 4 55. Jiao, X., Doamekpor, S.K., Bird, J.G., Nickels, B.E., Tong, L., Hart, R.P. and Kiledjian, M.  
5 (2017) 5' End nicotinamide adenine dinucleotide cap in human cells promotes RNA  
6 decay through DXO-mediated deNADding. *Cell*, **168**, 1015-1027.
- 7 56. DeVito, S.R., Ortiz-Riano, E., Martinez-Sobrido, L. and Munger, J. (2014)  
8 Cytomegalovirus-mediated activation of pyrimidine biosynthesis drives UDP-sugar  
9 synthesis to support viral protein glycosylation. *Proc. Natl. Acad. Sci. USA*, **111**, 18019-  
10 18024.
- 11 57. Enav, H., Mandel-Gutfreund, Y. and Beja, O. (2014) Comparative metagenomic  
12 analyses reveal viral-induced shifts of host metabolism towards nucleotide biosynthesis.  
13 *Microbiome*, **2**, 9.
- 14 58. Li, H., Zhu, W., Zhang, L., Lei, H., Wu, X., Guo, L., Chen, X., Wang, Y. and Tang, H.  
15 (2015) The metabolic responses to hepatitis B virus infection shed new light on  
16 pathogenesis and targets for treatment. *Sci. Rep.*, **5**, 8421.
- 17 59. Banerjee, S., Vishwanath, P., Cui, J., Kelleher, D.J., Gilmore, R., Robbins, P.W. and  
18 Samuelson, J. (2007) The evolution of N-glycan-dependent endoplasmic reticulum  
19 quality control factors for glycoprotein folding and degradation. *Proc. Natl. Acad. Sci.*  
20 *USA*, **104**, 11676-11681.
- 21 60. Yap, S.S.L., Nguyen-Khuong, T., Rudd, P.M. and Alonso, S. (2017) Dengue virus  
22 glycosylation: What do we know? *Front. Microbiol.*, **8**, 1415.
- 23 61. Banerjee, A.K. (1980) 5'-terminal cap structure in eucaryotic messenger ribonucleic  
24 acids. *Microbiol. Rev.*, **44**, 175-205.

- 1 62. Kuhn, R.J., Zhang, W., Rossmann, M.G., Pletnev, S.V., Corver, J., Lenches, E., Jones,  
2 C.T., Mukhopadhyay, S., Chipman, P.R., Strauss, E.G. *et al.* (2002) Structure of dengue  
3 virus: implications for flavivirus organization, maturation, and fusion. *Cell*, **108**, 717-725.
- 4 63. Cleaves, G.R. and Dubin, D.T. (1979) Methylation status of intracellular dengue type 2  
5 40 S RNA. *Virology*, **96**, 159-165.
- 6 64. Sendinc, E., Valle-Garcia, D., Dhall, A., Chen, H., Henriques, T., Sheng, W., Adelman, K.  
7 and Shi, Y. (2018) PCIF1 catalyzes m6Am mRNA methylation to regulate 1 gene  
8 expression. *bioRxiv*.
- 9 65. Wei, J., Liu, F., Lu, Z., Fei, Q., Ai, Y., He, P.C., Shi, H., Cui, X., Su, R., Klungland, A. *et*  
10 *al.* (2018) Differential m(6)A, m(6)Am, and m(1)A demethylation mediated by FTO in the  
11 cell nucleus and cytoplasm. *Mol. Cell*, **71**, 973-985.
- 12 66. Gokhale, N.S., McIntyre, A.B.R., McFadden, M.J., Roder, A.E., Kennedy, E.M., Gandara,  
13 J.A., Hopcraft, S.E., Quicke, K.M., Vazquez, C., Willer, J. *et al.* (2016) N6-  
14 Methyladenosine in Flaviviridae viral RNA genomes regulates infection. *Cell Host*  
15 *Microbe*, **20**, 654-665.
- 16 67. Mears, H.V. and Sweeney, T.R. (2018) Better together: the role of IFIT protein-protein  
17 interactions in the antiviral response. *J. Gen. Virol.*, **99**, 1463-1477.
- 18 68. Chow, K.T., Gale, M., Jr. and Loo, Y.M. (2018) RIG-I and other RNA sensors in antiviral  
19 immunity. *Annu. Rev. Immunol.*, **36**, 667-694.
- 20 69. Leppek, K., Das, R. and Barna, M. (2018) Functional 5' UTR mRNA structures in  
21 eukaryotic translation regulation and how to find them. *Nat. Rev. Mol. Cell Biol.*, **19**, 158-  
22 174.
- 23 70. Toczydlowska-Socha, D., Zielinska, M.M., Kurkowska, M., Astha, Almeida, C.F.,  
24 Stefaniak, F., Purta, E. and Bujnicki, J.M. (2018) Human RNA cap1 methyltransferase  
25 CMT1r1 cooperates with RNA helicase DHX15 to modify RNAs with highly structured 5'  
26 termini. *Philos. Trans. R. Soc. Lond. B Biol. Sci.*, **373**.

- 1 71. Castelo-Szekely, V., Arpat, A.B., Janich, P. and Gatfield, D. (2017) Translational  
2 contributions to tissue specificity in rhythmic and constitutive gene expression. *Genome*  
3 *Biol.*, **18**, 116.
- 4 72. Basu, R.S., Warner, B.A., Molodtsov, V., Pupov, D., Eshunina, D., Fernandez-Tornero,  
5 C., Kulbachinskiy, A. and Murakami, K.S. (2014) Structural basis of transcription  
6 initiation by bacterial RNA polymerase holoenzyme. *J. Biol. Chem.*, **289**, 24549-24559.
- 7 73. Gleghorn, M.L., Davydova, E.K., Basu, R., Rothman-Denes, L.B. and Murakami, K.S.  
8 (2011) X-ray crystal structures elucidate the nucleotidyl transfer reaction of transcript  
9 initiation using two nucleotides. *Proc. Natl. Acad. Sci. USA*, **108**, 3566-3571.
- 10 74. Zhang, Y., Degen, D., Ho, M.X., Sineva, E., Ebright, K.Y., Ebright, Y.W., Mekler, V.,  
11 Vahedian-Movahed, H., Feng, Y., Yin, R. *et al.* (2014) GE23077 binds to the RNA  
12 polymerase 'i' and 'i+1' sites and prevents the binding of initiating nucleotides. *Elife*, **3**,  
13 e02450.
- 14 75. Noguchi, S., Arakawa, T., Fukuda, S., Furuno, M., Hasegawa, A., Hori, F., Ishikawa-  
15 Kato, S., Kaida, K., Kaiho, A., Kanamori-Katayama, M. *et al.* (2017) FANTOM5 CAGE  
16 profiles of human and mouse samples. *Sci. Data*, **4**, 170112.
- 17 76. Adams, N.M., Bordelon, H., Wang, K.K., Albert, L.E., Wright, D.W. and Haselton, F.R.  
18 (2015) Comparison of three magnetic bead surface functionalities for RNA extraction  
19 and detection. *ACS Appl. Mater. Interfaces*, **7**, 6062-6069.
- 20 77. Topisirovic, I., Svitkin, Y.V., Sonenberg, N. and Shatkin, A.J. (2011) Cap and cap-  
21 binding proteins in the control of gene expression. *Wiley Interdiscip. Rev. RNA*, **2**, 277-  
22 298.

23



## 1 **Figure Legends**

2 **Figure 1.** Analysis of 5' cap structures in RNA by CapQuant. **(A)** Chemical structures of 5' caps.  
3 **(B)** Workflow for CapQuant applied to eukaryotic mRNA. **(C)** A representative HPLC trace for  
4 the separation of the enzymatic digestion mixture of RNA. **(D,E)** Illustration of CapQuant for  
5 m<sup>7</sup>GpppAm in mRNA from mouse kidney **(D)**, and NAD in total RNA from *E. coli* **(E)**, showing  
6 HPLC elution profiles and MS/MS transitions ( $m/z X \rightarrow Y$ ) for unlabeled pure standard (top), the  
7 RNA sample (middle), and isotope-labeled standard spiked into the RNA sample (bottom).  
8 Similar illustrations of CapQuant for all other caps are shown in **Supplementary Figure S8**.

9 **Figure 2.** Quantification of 5' cap structures in cellular RNA and viral RNA genome by  
10 CapQuant. **(A)** mRNA from Human CCRF-SB cells. **(B)** mRNA from mouse C57BL/6 liver and  
11 kidney tissues. \*  $P < 0.05$ , \*\*  $P < 0.01$ , two-tailed paired Student's  $t$  test. **(C)** mRNA from  
12 *Saccharomyces cerevisiae* W1588-4C cells. Exposure to hydrogen peroxide (H<sub>2</sub>O<sub>2</sub>) or methyl  
13 methanesulfonate (MMS) induces changes to the profile of 5' cap structures in mRNA from  
14 *Saccharomyces cerevisiae*. From left to right: untreated, H<sub>2</sub>O<sub>2</sub>-treated, MMS-treated. \*\*  $P < 0.01$ ,  
15 two-tailed unpaired Student's  $t$  test. **(D)** *E. coli* DH5 $\alpha$  total RNA. **(E)** DENV-2 virus RNA genome.  
16 Values represent mean  $\pm$  SD for three independent cultures for CCRF-SB, W1588-4C and  
17 DH5 $\alpha$ , for three biological replicates of three mice and H<sub>2</sub>O<sub>2</sub>- or MMS-treated W1588-4C cells,  
18 and for three technical replicates of a single culture for DENV-2.

19 **Figure 3.** Cap profile correlation with CAGE-analyzed transcription start site (TSS) nucleotide  
20 distribution. The frequency of A, G, C, and T as the second nucleotide in m<sup>7</sup>GpppN caps was  
21 plotted against the distribution of these nucleotides at TSSs in **(A)** human (FANTOM5-weighted  
22 TSS), **(B)** mouse liver and kidney (FANTOM5-weighted TSS), and **(C)** *Saccharomyces*  
23 *cerevisiae* (YeastTSS-weighted TSS). TSS values were calculated as described in MATERIALS  
24 AND METHODS.

1 **Figure 1**  
2

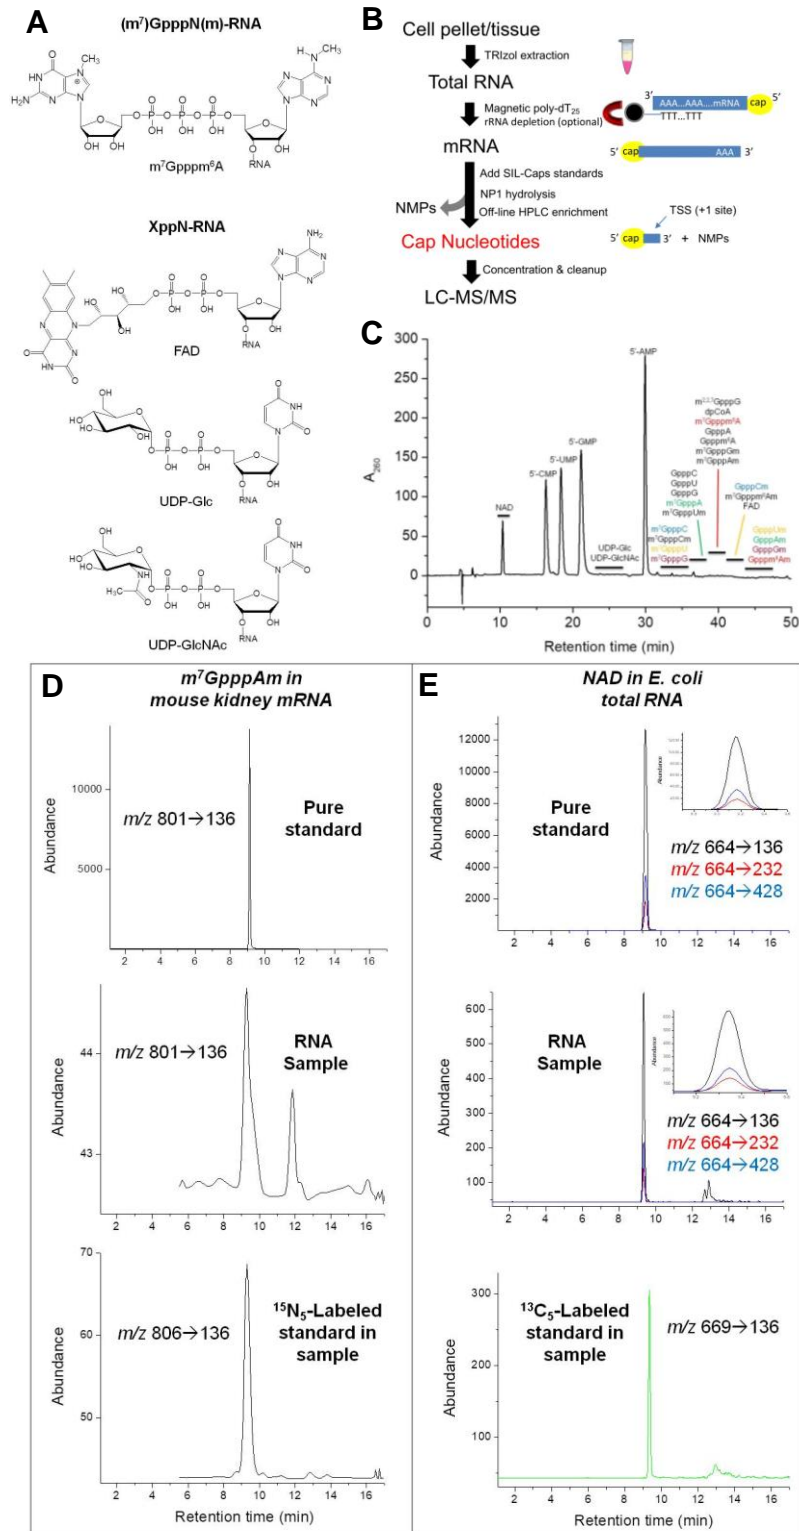

3

1 **Figure 2**  
2

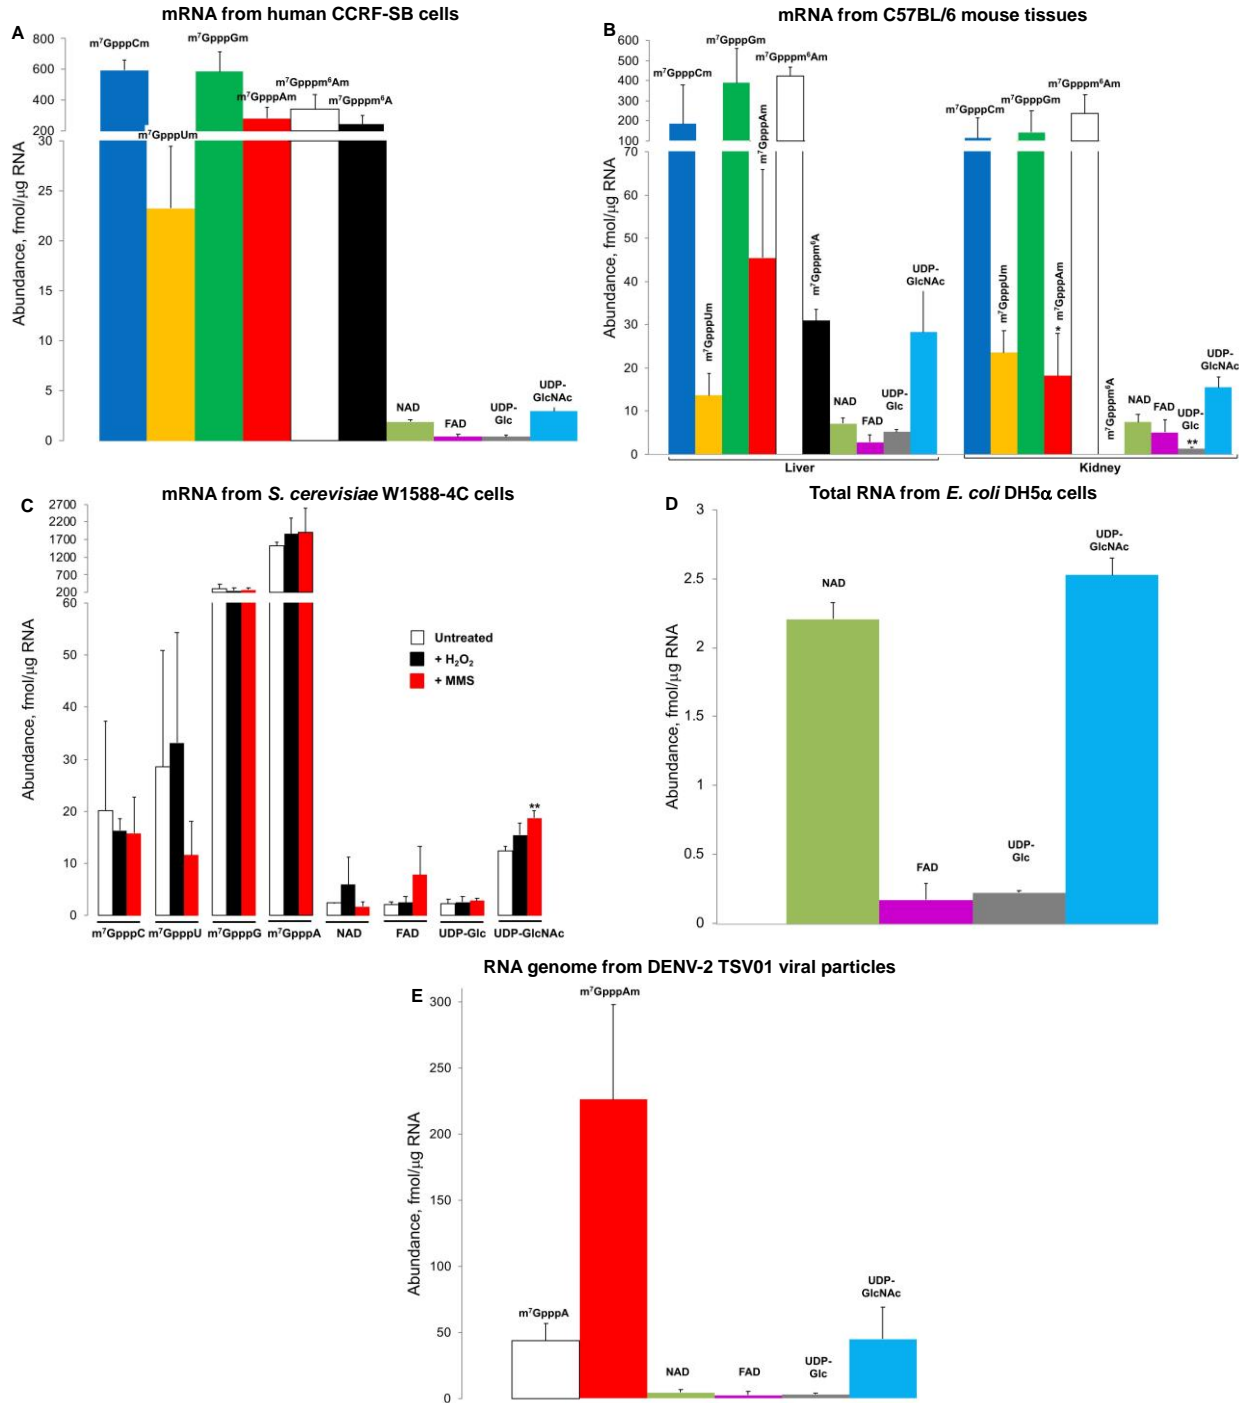

3  
4

1 **Figure 3**

2  
3

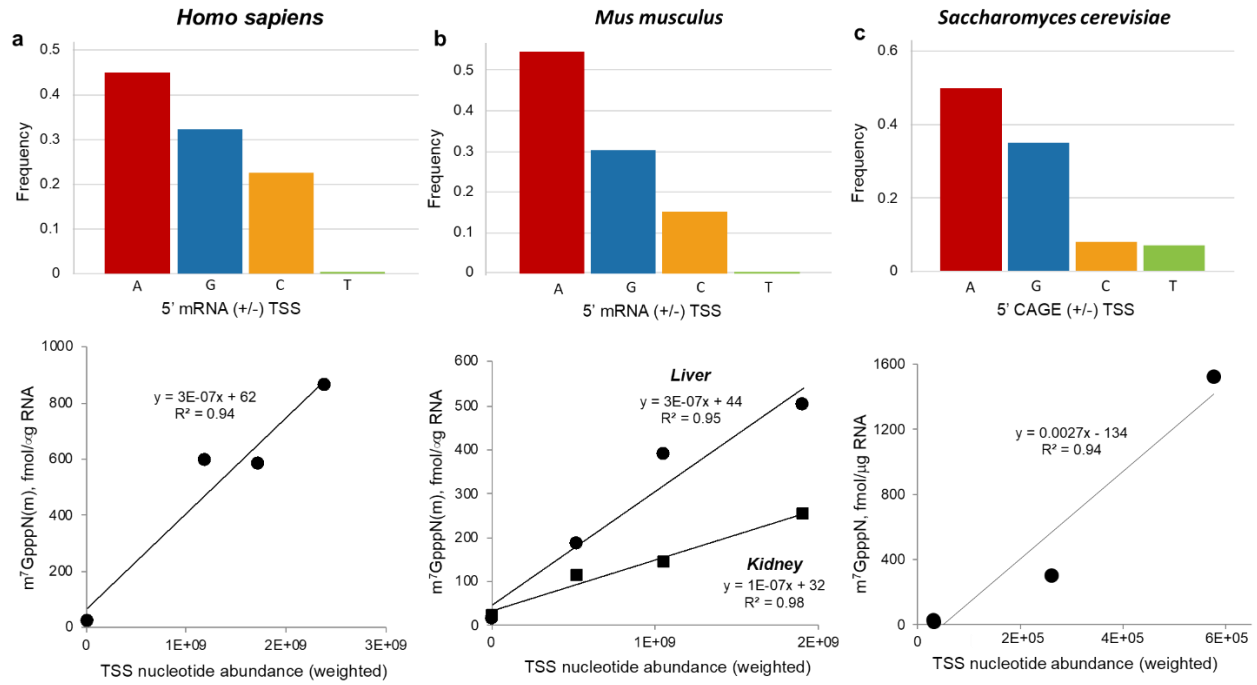

4  
5

1 **Table 1: Cap compositions in cellular and viral RNA species<sup>1</sup>**

| Cap                                    | Level, fmol per $\mu\text{g}$ RNA<br>(Percentage, %) |                                   |                                    |                                          |                                             |                                  |
|----------------------------------------|------------------------------------------------------|-----------------------------------|------------------------------------|------------------------------------------|---------------------------------------------|----------------------------------|
|                                        | Human<br>CCRF-SB<br>mRNA                             | Mouse<br>C57BL/6<br>liver mRNA    | Mouse<br>C57BL/6<br>kidney mRNA    | <i>S. cerevisiae</i><br>W1588-4C<br>mRNA | <i>E. coli</i><br>DH5 $\alpha$<br>total RNA | DENV-2<br>TSV01<br>RNA genome    |
| m <sup>7</sup> GpppCm                  | 595 $\pm$ 65<br>(27 $\pm$ 3)                         | 184 $\pm$ 195<br>(16 $\pm$ 17)    | 114 $\pm$ 101<br>(20 $\pm$ 18)     | nd                                       | nd                                          | nd                               |
| m <sup>7</sup> GpppUm                  | 23 $\pm$ 6<br>(1.1 $\pm$ 0.3)                        | 14 $\pm$ 5<br>(1.2 $\pm$ 0.5)     | 24 $\pm$ 5<br>(4.2 $\pm$ 0.9)      | nd                                       | nd                                          | nd                               |
| m <sup>7</sup> GpppGm                  | 585 $\pm$ 128<br>(28 $\pm$ 6)                        | 389 $\pm$ 172<br>(34 $\pm$ 15)    | 144 $\pm$ 105<br>(25 $\pm$ 18)     | nd                                       | nd                                          | nd                               |
| m <sup>7</sup> GpppAm                  | 282 $\pm$ 76<br>(14 $\pm$ 4)                         | 46 $\pm$ 20<br>(4.0 $\pm$ 1.8)    | 18 $\pm$ 10<br>(3 $\pm$ 2)         | nd                                       | nd                                          | 226 $\pm$ 72<br>(70 $\pm$ 22)    |
| m <sup>7</sup> Gpppm <sup>6</sup> Am   | 345 $\pm$ 93<br>(17 $\pm$ 4)                         | 425 $\pm$ 43.4<br>(38 $\pm$ 4)    | 237 $\pm$ 92<br>(42 $\pm$ 16)      | nd                                       | nd                                          | nd                               |
| m <sup>7</sup> GpppC                   | nd                                                   | nd                                | nd                                 | 20 $\pm$ 17<br>(1.1 $\pm$ 0.9)           | nd                                          | nd                               |
| m <sup>7</sup> GpppU                   | nd                                                   | nd                                | nd                                 | 28 $\pm$ 22<br>(1.5 $\pm$ 1.2)           | nd                                          | nd                               |
| m <sup>7</sup> GpppG                   | nd                                                   | nd                                | nd                                 | 305 $\pm$ 130<br>(16 $\pm$ 7)            | nd                                          | nd                               |
| m <sup>7</sup> GpppA                   | nd                                                   | nd                                | nd                                 | 1524 $\pm$ 106<br>(80 $\pm$ 6)           | nd                                          | 44 $\pm$ 12<br>(14 $\pm$ 4)      |
| m <sup>7</sup> Gpppm <sup>6</sup> A    | 244 $\pm$ 61<br>(12 $\pm$ 3)                         | 31 $\pm$ 3<br>(2.7 $\pm$ 0.2)     | nd                                 | nd                                       | nd                                          | nd                               |
| NAD                                    | 1.9 $\pm$ 0.2<br>(0.09 $\pm$ 0.01)                   | 7.1 $\pm$ 1.2<br>(0.6 $\pm$ 0.1)  | 7.4 $\pm$ 1.8<br>(1.3 $\pm$ 0.3)   | 2.4 $\pm$ 0.1<br>(0.13 $\pm$ 0.01)       | 2.2 $\pm$ 0.1<br>(43 $\pm$ 2)               | 4.5 $\pm$ 2.5<br>(1.4 $\pm$ 0.8) |
| FAD                                    | 0.4 $\pm$ 0.2<br>(0.02 $\pm$ 0.01)                   | 2.8 $\pm$ 1.8<br>(0.2 $\pm$ 0.2)  | 5.0 $\pm$ 3.1<br>(0.9 $\pm$ 0.5)   | 2.0 $\pm$ 0.6<br>(0.11 $\pm$ 0.03)       | 0.17 $\pm$ 0.12<br>(3.3 $\pm$ 2.4)          | 2.5 $\pm$ 2.6<br>(0.8 $\pm$ 0.8) |
| UDP-Glc                                | 0.4 $\pm$ 0.1<br>(0.02 $\pm$ 0.01)                   | 5.2 $\pm$ 0.5<br>(0.4 $\pm$ 0.04) | 1.4 $\pm$ 0.3<br>(0.25 $\pm$ 0.05) | 2.2 $\pm$ 0.8<br>(0.12 $\pm$ 0.04)       | 0.22 $\pm$ 0.02<br>(4.3 $\pm$ 0.3)          | 3.2 $\pm$ 0.6<br>(1 $\pm$ 0.2)   |
| UDP-GlcNAc                             | 2.9 $\pm$ 0.4<br>(0.14 $\pm$ 0.02)                   | 28 $\pm$ 10<br>(2.5 $\pm$ 0.9)    | 15 $\pm$ 2<br>(2.7 $\pm$ 0.4)      | 12 $\pm$ 0.8<br>(0.66 $\pm$ 0.04)        | 2.5 $\pm$ 0.1<br>(49 $\pm$ 2)               | 44 $\pm$ 24<br>(14 $\pm$ 7)      |
| Total caps,<br>fmol/ $\mu\text{g}$ RNA | 2078 $\pm$ 430                                       | 1131 $\pm$ 449                    | 566 $\pm$ 320                      | 1896 $\pm$ 278                           | 5.1 $\pm$ 0.4                               | 325 $\pm$ 114                    |

2 <sup>1</sup> Values (as fmol per  $\mu\text{g}$  RNA or percentage for each detected cap) represent mean  $\pm$  SD for three  
3 independent cultures for all cell lines, for tissues from three different mice, and for three technical  
4 replicates of a single culture for DENV-2 virus. nd, not detectable.

5
